# Supplementary material
Source: PubMed Central journal article supplement (PMC6498046)
Supplement: JVI.01910-18-s0002.pdf [file JVI.01910-18-s0002.pdf]

**Supplemental Data Set S2. Multi sequences alignment of 337 Rep proteins with ConSurf conservation scores**

MSA with 337 Rep protein sequences from different geminiviral species and isolates ([DOI: 10.1104/pp.18.00268](https://doi.org/10.1104/pp.18.00268)) in which every amino acid residue is colored according to the degree-of-sequence conservation using a scale from maroon (highest) to cyan (lowest) based on the ConSurf program (<https://doi.org/10.1093/nar/gkq399>).

# ConSurf Color-Coded MSA

|     |              |   |   |   |   |   |   |   |   |   |   |   |     |   |   |   |   |   |   |   |   |   |   |   |   |   |   |   |   |   |   |   |   |   |   |   |   |   |   |   |   |   |   |   |   |   |   |   |   |   |   |   |
|-----|--------------|---|---|---|---|---|---|---|---|---|---|---|-----|---|---|---|---|---|---|---|---|---|---|---|---|---|---|---|---|---|---|---|---|---|---|---|---|---|---|---|---|---|---|---|---|---|---|---|---|---|---|---|
| 001 | AllLCV (S)   | R | F | S | I | K | A | K | N | Y | F | L | T   | Y | P | Q | C | S | L | T | K | E | E | A | L | S | Q | L | Q | N | L | Q | T | P | T | N | K | K | - | F | I | K | I | C | R | E | L | - | - | - | - |   |
| 002 | TbLCZV (S)   | R | F | Q | I | N | S | K | N | Y | F | V | T   | Y | P | K | C | S | L | T | K | E | E | T | L | S | Q | L | L | N | L | E | T | P | T | N | K | K | - | Y | I | K | I | C | R | E | L | - | - | - | - |   |
| 003 | TbLCPuV (S)  | I | I | S | - | - | - | - | - | - | L | I | H   | S | A | H | S | P | - | K | R | K | H | F | P | N | Y | E | T | Y | P | H | L | Q | I | K | N | - | S | S | R | S | A | E | S | F | - | - | - | - |   |   |
| 004 | CraYVV (S)   | K | F | R | I | N | A | K | N | Y | F | L | T   | Y | P | H | C | S | L | T | K | E | E | A | L | S | Q | I | K | A | L | E | T | P | I | T | K | L | - | F | I | R | I | C | R | E | L | - | - | - | - |   |
| 005 | SiYMAV (S)   | S | F | S | I | K | A | K | N | Y | F | I | T   | Y | P | R | C | S | L | T | K | E | D | T | L | S | Q | L | Q | A | L | Q | T | P | V | N | K | K | - | F | I | K | I | C | R | E | L | - | - | - | - |   |
| 006 | EYVV (S)     | R | F | L | I | N | A | K | N | Y | F | L | T   | Y | P | H | C | S | L | T | K | E | E | A | L | S | Q | I | T | K | L | S | T | P | T | N | K | L | - | F | I | R | I | C | R | E | L | - | - | - | - |   |
| 007 | ToLCBV (S)   | R | F | Q | I | Y | A | K | N | Y | F | L | T   | Y | P | Q | C | S | L | T | K | E | E | A | L | S | Q | I | K | N | L | A | T | P | T | N | K | L | - | F | I | R | V | S | R | E | L | - | - | - | - |   |
| 008 | SiGMBuV (S)  | R | F | K | V | S | A | K | N | Y | F | L | T   | Y | P | Q | C | S | L | T | K | E | E | A | L | S | Q | L | Q | N | L | T | T | P | V | N | K | K | - | F | I | K | V | C | R | E | L | - | - | - | - |   |
| 009 | LuYVV (S)    | S | F | Q | I | K | A | K | N | I | F | L | T   | Y | P | K | C | P | I | P | K | E | E | A | L | E | L | I | K | A | I | H | C | P | S | D | K | L | - | F | I | R | V | A | Q | E | K | - | - | - | - |   |
| 010 | WDIV (N)     | T | F | R | Y | R | S | N | N | C | F | L | T   | F | P | H | C | N | S | C | P | Y | G | M | V | Q | H | F | W | D | L | I | S | T | W | S | P | I | - | Y | A | V | A | S | V | E | L | - | - | - | - |   |
| 011 | CSMV (Q)     | A | F | S | L | R | T | K | H | V | F | L | T   | Y | P | R | C | P | I | S | P | E | E | A | G | Q | K | I | A | D | R | L | K | N | K | K | C | N | - | Y | I | Y | I | S | R | E | F | - | - | - | - |   |
| 012 | PouMGDV (S)  | R | F | S | I | K | A | K | N | Y | F | L | T   | Y | P | Q | C | S | L | S | K | E | E | A | L | S | Q | L | Q | N | L | I | T | P | T | N | K | K | - | Y | I | K | I | C | R | E | L | - | - | - | - |   |
| 013 | PaLCuGdV (S) | K | F | Q | I | N | A | K | N | Y | F | L | T   | Y | P | H | C | S | L | T | K | E | E | T | L | D | Q | I | K | A | L | D | T | A | T | N | K | K | - | F | I | K | V | C | R | E | L | - | - | - | - |   |
| 014 | SiGYVV (S)   | I | L | S | L | I | Q | T | - | - | - | - | -   | - | - | - | - | V | L | L | T | K | E | E | A | L | S | Q | L | L | N | L | S | T | P | V | N | K | K | - | F | I | K | I | C | R | E | L | - | - | - | - |
| 015 | CLCrV (D)    | S | F | R | L | Q | A | R | H | I | F | L | T   | Y | P | K | C | D | I | P | K | N | E | A | L | Q | M | L | Q | T | L | S | W | S | V | V | K | P | T | Y | I | R | V | A | R | E | E | - | - | - | - |   |
| 016 | ToLCSuV (S)  | S | F | C | V | N | A | K | N | I | F | L | T   | Y | P | Q | C | S | L | S | K | E | T | V | L | E | N | I | L | G | I | S | C | P | S | E | K | L | - | F | V | R | V | S | Q | E | K | - | - | - | - |   |
| 017 | CPGMV (S)    | A | F | R | V | N | A | K | N | I | F | A | T   | Y | P | R | C | S | L | P | K | E | E | A | L | E | L | L | R | Q | I | P | T | A | V | N | K | K | - | F | I | K | V | A | R | E | L | - | - | - | - |   |
| 018 | AYVSLV (S)   | R | F | K | I | N | A | K | N | Y | F | L | T   | Y | P | K | C | S | L | T | K | E | E | A | L | S | Q | L | L | N | L | E | T | P | T | S | K | K | - | F | I | R | I | C | R | E | L | - | - | - | - |   |
| 019 | SiGMBcV (S)  | S | F | Y | V | K | A | K | N | Y | F | I | T   | Y | P | D | C | S | L | T | K | E | E | A | L | S | Q | L | Q | N | L | S | T | P | V | N | K | K | - | F | I | K | I | C | R | E | L | - | - | - | - |   |
| 020 | DaLDV (S)    | K | F | R | V | N | S | K | N | Y | F | L | T   | Y | P | Q | C | S | L | T | K | E | E | A | L | S | Q | I | Q | A | I | K | T | P | V | N | K | K | - | F | I | K | I | C | R | E | L | - | - | - | - |   |
| 021 | ToLCToV (S)  | R | F | K | I | Q | A | K | N | Y | F | L | T   | Y | P | K | C | N | L | T | K | E | E | A | L | S | Q | L | L | N | I | D | T | P | T | N | K | R | - | F | I | K | I | C | R | E | L | - | - | - | - |   |
| 022 | ToLCNDV4 (S) | R | V | R | E | N | A | K | K | Y | F | L | T   | D | P | K | C | S | L | T | K | G | E | A | L | C | Q | L | Q | T | R | E | T | Q | G | Q | K | K | - | F | L | S | I | C | R | E | L | - | - | - | - |   |
| 023 | TCTV (S)     | Q | Y | R | I | H | A | K | N | I | F | L | T   | Y | P | H | C | H | L | T | K | E | D | A | L | L | Q | L | Q | T | I | Q | C | P | S | T | K | K | - | F | I | R | I | C | R | E | R | - | - | - | - |   |
| 024 | TYLCMaIV (S) | R | F | Q | I | N | C | K | N | Y | F | L | T   | Y | P | K | C | S | L | T | K | E | E | A | L | S | Q | L | K | N | L | E | T | P | T | N | K | K | - | Y | I | K | V | C | R | E | L | - | - | - | - |   |
| 025 | TYLCAxV (S)  | L | F | K | I | Y | A | K | N | Y | F | L | T   | Y | P | N | C | S | L | S | K | E | E | A | L | S | Q | L | K | N | L | E | T | P | T | N | K | K | - | Y | I | K | V | C | R | E | L | - | - | - | - |   |
| 026 | SiYVVV (S)   | R | F | R | L | S | A | K | N | Y | F | L | T   | Y | P | Q | C | S | L | T | K | E | E | A | L | S | Q | L | Q | N | L | N | T | P | T | N | K | K | - | Y | I | K | I | C | R | E | L | - | - | - | - |   |
| 027 | PepLCV (S)   | K | F | R | I | N | A | K | N | Y | F | L | T   | Y | P | H | C | S | L | T | K | E | E | A | L | S | Q | I | Q | A | I | E | T | P | T | N | K | L | - | F | I | R | I | C | R | E | L | - | - | - | - |   |
| 028 | DaChMV (S)   | K | F | R | I | N | A | K | N | Y | F | L | T   | Y | P | R | C | S | L | T | K | E | G | A | L | L | Q | L | Q | K | L | K | T | P | T | N | I | K | - | F | I | R | V | S | R | E | L | - | - | - | - |   |
| 029 | VBSMV (S)    | R | F | K | I | N | A | K | N | Y | F | L | T   | Y | P | R | C | S | L | S | K | E | S | A | L | E | Q | L | I | A | L | S | T | P | V | N | K | K | - | F | I | R | I | C | R | E | L | - | - | - | - |   |
| 030 | SSMV2 (S)    | N | F | R | F | R | A | R | S | A | F | L | T   | Y | P | K | C | T | L | E | P | R | D | V | V | E | H | L | Y | S | K | F | R | K | Y | G | P | K | - | Y | C | L | V | T | R | E | H | - | - | - | - |   |
| 031 | ToMoLCV (S)  | R | F | R | I | H | S | K | N | Y | F | L | T   | Y | P | K | C | S | L | T | K | E | E | A | L | S | Q | L | L | G | L | Q | T | P | V | N | K | L | - | F | V | R | V | A | R | E | L | - | - | - | - |   |
| 032 | BCTIV (A)    | Y | L | R | F | Q | K | K | N | A | F | L | T   | Y | S | Q | I | G | G | D | F | K | D | Y | I | F | E | K | L | K | T | L | L | E | S | Y | V | I | L | F | L | A | V | S | L | E | H | H | Q | P | T |   |
| 033 | PepLCLaV (S) | S | F | C | V | N | A | K | N | I | F | L | T   | Y | P | K | C | P | I | P | K | E | Q | M | L | E | I | L | Q | S | I | N | C | P | S | D | K | L | - | F | I | R | V | A | Q | E | K | - | - | - | - |   |
| 034 | KuMV (S)     | G | F | R | V | N | A | K | N | Y | F | L | T   | Y | P | R | C | S | L | S | K | E | A | A | L | E | Q | L | Q | R | L | E | S | N | V | N | K | K | - | F | I | R | V | C | R | E | F | - | - | - | - |   |
| 035 | CoYSV (S)    | S | F | S | I | K | A | K | N | Y | F | L | T   | Y | P | Q | C | S | L | T | K | E | E | A | L | S | Q | L | Q | N | L | N | T | P | V | N | K | K | - | F | I | K | I | C | R | E | L | - | - | - | - |   |
| 036 | ChiLCPKV (S) | Q | F | Q | V | K | A | K | N | I | F | L | T   | Y | P | K | C | P | I | P | K | E | Q | I | L | E | I | L | K | S | I | N | C | P | S | D | K | L | - | F | I | R | V | S | Q | E | K | - | - | - | - |   |
| 037 | JLCuV (S)    | A | F | S | V | S | A | K | N | I | F | L | T   | Y | P | K | C | P | L | S | K | E | T | V | L | D | L | L | R | N | I | S | C | P | S | D | K | L | - | F | I | R | V | A | Q | E | K | - | - | - | - |   |
| 038 | ErYMV (S)    | K | F | R | I | N | A | K | N | Y | F | L | T   | Y | P | R | C | S | L | T | K | E | E | A | L | S | Q | I | K | A | L | E | T | P | I | S | K | L | - | F | I | R | I | C | R | E | L | - | - | - | - |   |
| 039 | CLCuMuV (S)  | R | F | Q | I | Y | S | K | N | Y | F | L | T   | Y | P | K | C | S | L | T | K | E | E | A | L | S | Q | I | Q | N | L | Q | T | P | T | N | K | K | - | F | I | K | I | C | K | E | L | - | - | - | - |   |
| 040 | PaLCuV (S)   | S | F | C | V | N | A | K | N | I | F | L | T   | Y | P | K | C | P | I | P | K | E | Q | M | L | E | I | L | Q | S | I | N | C | P | S | D | K | L | - | F | I | R | V | A | Q | E | K | - | - | - | - |   |
| 041 | ToMoTaV (S)  | S | F | S | V | K | A | K | N | Y | F | L | T   | Y | P | Q | C | S | L | S | K | E | E | A | L | S | Q | I | Q | N | L | N | T | P | V | D | K | K | - | F | I | K | I | C | R | E | L | - | - | - | - |   |
| 042 | ToCLLDV (S)  | K | F | R | I | N | S | K | N | Y | F | L | T   | Y | P | Q | C | S | L | T | K | E | E | A | L | S | Q | L | Q | N | L | K | T | P | V | N | K | K | - | F | I | K | I | C | R | E | L | - | - | - | - |   |
| 043 | SPLCV (S)    | R | F | K | I | Q | A | K | N | Y | F | I | T   | Y | P | R | C | S | L | S | K | E | D | C | L | A | Q | L | L | N | I | Q | T | P | S | N | K | K | - | Y | I | H | V | A | R | E | L | - | - | - | - |   |
| 044 | CLYMV (S)    | R | F | S | V | S | A | K | N | I | F | L | T   | Y | S | K | C | P | I | P | K | E | Q | M | L | E | L | I | K | N | I | S | C | P | S | E | K | L | - | F | I | R | V | A | Q | E | K | - | - | - | - |   |
| 045 | ToLCV (G)    | R | F | R | I | Q | A | K | N | F | F | L | T</ |   |   |   |   |   |   |   |   |   |   |   |   |   |   |   |   |   |   |   |   |   |   |   |   |   |   |   |   |   |   |   |   |   |   |   |   |   |   |   |



|     |                |   |   |   |   |   |   |   |   |   |   |   |   |   |   |   |   |   |   |   |   |   |   |   |   |   |   |   |   |   |   |   |   |   |   |   |   |   |   |   |   |   |   |   |   |   |   |   |   |   |   |
|-----|----------------|---|---|---|---|---|---|---|---|---|---|---|---|---|---|---|---|---|---|---|---|---|---|---|---|---|---|---|---|---|---|---|---|---|---|---|---|---|---|---|---|---|---|---|---|---|---|---|---|---|---|
| 067 | MSV (S)        | - | F | S | H | R | N | V | N | T | F | L | T | Y | P | H | C | P | E | N | P | E | I | V | C | Q | M | I | W | E | L | V | G | R | W | T | P | K | - | Y | I | I | C | A | Q | E | A | - | - | - | - |
| 068 | ToLCArV (S)    | R | F | Q | I | N | S | K | N | Y | F | L | T | Y | P | K | C | S | L | N | K | E | E | A | L | S | Q | L | L | N | T | D | T | P | T | N | K | K | - | F | I | K | I | C | R | E | L | - | - | - | - |
| 069 | PDSMV (V)      | C | F | E | V | R | S | R | N | V | F | L | T | Y | S | R | C | H | L | E | P | S | F | M | L | E | R | L | S | R | L | L | K | K | W | D | P | T | - | Y | S | Y | V | A | R | E | E | - | - | - | - |
| 070 | PanSV (S)      | S | F | R | H | R | N | A | N | T | F | L | T | Y | S | K | C | P | L | E | P | E | F | I | G | E | H | L | F | R | L | T | K | D | F | E | P | A | - | Y | I | L | V | V | R | E | T | - | - | - | - |
| 071 | ToLCGxV (S)    | R | F | Q | I | Y | A | K | N | F | F | L | T | Y | P | Q | C | S | L | T | K | E | E | A | L | S | Q | I | K | N | L | N | T | P | T | N | K | K | - | Y | I | K | I | C | S | E | L | - | - | - | - |
| 072 | BCSMV (M)      | C | F | E | V | R | S | R | N | I | F | L | T | Y | S | K | C | H | L | D | P | V | F | M | Q | E | H | L | S | S | L | L | R | R | F | E | P | T | - | Y | V | Y | V | A | R | E | E | - | - | - | - |
| 073 | DSV (S)        | - | F | R | H | R | N | A | N | T | F | L | T | Y | S | K | C | D | H | S | P | Q | L | I | A | D | H | L | W | D | L | L | K | S | W | N | P | I | - | Y | I | L | V | A | S | E | H | - | - | - | - |
| 074 | AYVV (S)       | R | F | K | I | Q | A | K | N | Y | F | L | T | Y | P | Q | C | S | L | T | K | E | E | A | L | S | Q | L | Q | N | L | D | T | P | T | N | K | K | - | Y | I | K | V | C | R | E | L | - | - | - | - |
| 075 | SLCuPV (S)     | R | F | R | I | S | A | K | N | Y | F | V | T | Y | P | K | C | S | L | T | K | E | E | A | L | S | Q | L | Q | T | L | E | T | P | T | S | K | K | - | F | I | K | I | C | R | E | L | - | - | - | - |
| 076 | MCLCuV (D)     | S | F | R | L | T | R | N | I | F | L | T | Y | P | K | C | D | V | P | K | D | E | V | L | Q | M | L | Q | G | L | S | W | S | V | V | R | P | T | Y | I | R | V | A | R | E | E | - | - | - | - |   |
| 077 | ToLCHaiV (S)   | R | F | K | I | Q | A | K | N | Y | F | L | T | Y | P | Q | C | S | L | T | K | E | E | A | L | S | Q | L | Q | N | L | D | T | P | T | N | K | K | - | Y | I | K | I | C | R | E | F | - | - | - | - |
| 078 | ChaYMV (S)     | R | F | Q | I | N | A | K | N | Y | F | L | T | Y | P | Q | C | S | L | T | K | E | E | A | L | S | Q | L | R | S | L | R | T | P | T | N | Q | K | - | Y | I | K | V | C | R | E | L | - | - | - | - |
| 079 | TYLCSV (S)     | R | F | S | I | K | A | K | N | Y | F | L | T | Y | P | K | C | D | L | T | K | E | N | A | L | S | Q | I | T | N | L | Q | T | P | T | N | K | L | - | F | I | K | I | C | R | E | L | - | - | - | - |
| 080 | MacYMFV (S)    | R | F | K | I | N | A | K | N | F | F | L | T | Y | P | Q | C | S | L | S | K | E | E | T | L | S | Q | I | K | A | L | N | T | P | T | S | K | K | - | Y | I | K | I | A | R | E | L | - | - | - | - |
| 081 | ChLCV (D)      | S | F | R | I | Q | A | R | N | I | F | L | T | Y | P | Q | C | D | I | P | K | D | E | A | L | L | L | Q | S | L | P | W | S | V | V | K | P | T | Y | I | R | V | A | R | E | E | - | - | - | - |   |
| 082 | JMNV (S)       | K | F | Q | I | N | C | K | N | L | F | L | T | Y | P | Q | C | S | L | S | K | E | E | T | L | S | Q | L | T | N | L | S | L | P | S | N | P | K | - | F | I | R | I | C | R | E | L | - | - | - | - |
| 083 | WDV (D)        | R | F | R | V | Y | S | K | Y | L | F | L | T | Y | P | Q | C | I | L | E | P | Q | Y | A | L | D | S | L | R | T | L | L | A | K | Y | E | P | L | - | Y | I | A | A | V | R | E | L | - | - | - | - |
| 084 | AbMBoV (S)     | P | F | Q | I | N | A | K | N | Y | F | L | T | Y | P | K | C | S | L | S | K | E | E | V | L | S | Q | L | L | N | L | Q | T | P | T | N | K | K | - | Y | V | K | I | C | R | E | L | - | - | - | - |
| 085 | SPLCHnV (S)    | G | F | R | L | Q | A | K | N | I | F | L | T | Y | P | K | C | P | L | S | K | D | T | V | L | E | L | L | K | G | I | Q | C | P | S | D | K | L | - | F | I | R | V | A | Q | E | K | - | - | - | - |
| 086 | CleLCrV (S)    | R | F | L | I | N | A | R | N | Y | F | L | T | Y | P | K | C | S | L | T | K | E | E | A | L | S | Q | L | Q | A | L | A | T | P | T | N | K | K | - | F | I | K | V | A | R | E | L | - | - | - | - |
| 087 | ToLCHsV (S)    | R | F | T | I | N | A | K | N | Y | F | L | T | Y | P | Q | C | P | L | S | K | E | E | A | L | S | Q | L | L | N | L | S | T | P | T | N | K | K | - | F | I | K | I | C | R | E | L | - | - | - | - |
| 088 | SiYMYuV (S)    | R | S | K | V | S | A | K | N | Y | F | L | T | Y | P | K | C | S | L | T | K | E | E | A | L | S | Q | L | Q | N | L | N | T | P | V | N | K | K | - | F | I | K | I | C | R | E | L | - | - | - | - |
| 089 | SPLCUV (RXXS)  | R | F | N | I | K | A | K | N | Y | F | L | T | Y | P | Q | C | S | L | T | K | E | E | A | L | D | Q | L | L | N | L | N | T | P | T | N | K | K | - | F | I | K | I | C | R | E | L | - | - | - | - |
| 090 | ToLCGdV (S)    | R | F | S | I | K | A | K | N | Y | F | L | T | Y | P | Q | C | S | L | T | K | E | E | A | L | S | Q | L | Q | N | L | Q | T | P | T | N | I | K | - | F | I | K | I | C | R | E | L | - | - | - | - |
| 091 | EACMZV (S)     | R | F | K | I | Q | A | K | N | Y | F | L | T | Y | P | K | C | S | L | S | K | H | E | A | L | S | Q | I | L | N | I | P | T | P | T | N | K | K | - | Y | I | K | V | C | R | E | L | - | - | - | - |
| 092 | ToMYLCV (D)    | S | F | R | L | Q | A | K | N | I | F | L | T | Y | P | Q | C | D | V | P | K | D | E | F | L | Q | L | H | N | L | P | W | S | I | V | K | P | S | Y | I | R | V | A | R | E | E | - | - | - | - |   |
| 093 | SACMV (S)      | R | F | S | I | K | A | K | N | Y | F | L | T | Y | P | K | C | N | L | S | K | E | A | A | L | D | Q | L | R | Q | L | Q | T | P | T | N | K | L | - | F | I | K | I | C | R | E | L | - | - | - | - |
| 094 | ToLDeV (S)     | A | F | K | I | N | A | K | N | Y | F | L | T | Y | P | H | C | N | L | T | K | E | E | A | L | S | Q | L | Q | N | L | E | T | P | T | N | K | K | - | Y | I | K | I | A | R | E | L | - | - | - | - |
| 095 | ToMoV (S)      | K | F | R | V | Q | S | K | N | Y | F | L | T | Y | P | Q | C | S | L | S | K | E | E | A | L | S | Q | L | Q | N | L | N | T | P | V | N | K | K | - | F | I | K | I | C | R | E | L | - | - | - | - |
| 096 | TPCTV (S)      | R | F | Q | I | A | A | K | N | Y | F | L | T | Y | P | N | C | S | L | S | K | E | E | A | L | D | Q | L | Q | R | L | Q | T | P | T | N | K | K | - | Y | I | K | V | A | R | E | L | - | - | - | - |
| 097 | TYLCV (S)      | L | F | K | I | Y | A | K | N | Y | F | L | T | Y | P | N | C | S | L | S | K | E | E | A | L | S | Q | L | K | K | L | E | T | P | T | N | K | K | - | Y | I | K | V | C | K | E | L | - | - | - | - |
| 098 | ViYMV (D)      | A | F | R | I | Q | A | R | N | I | F | L | T | Y | P | Q | C | D | I | N | K | D | A | L | Q | M | L | Q | S | L | S | W | S | V | V | K | P | T | Y | I | R | V | S | R | E | E | - | - | - | - |   |
| 099 | DCSMV (M)      | S | F | E | V | R | A | K | N | I | F | L | T | Y | S | K | C | L | L | D | P | Q | E | A | L | R | D | I | T | H | K | L | R | K | F | E | P | T | - | Y | V | Y | V | A | R | E | L | - | - | - | - |
| 100 | ACMV (S)       | R | F | R | V | Q | A | K | N | V | F | L | T | Y | P | K | C | S | I | P | K | E | H | L | S | F | I | Q | T | L | S | L | P | S | N | P | K | - | F | I | K | I | C | R | E | L | - | - | - | - |   |
| 101 | ICMV (S)       | R | F | Q | I | N | A | K | N | Y | F | L | T | Y | P | R | C | S | L | T | K | E | E | A | L | S | Q | I | R | N | F | Q | T | P | T | N | P | K | - | F | I | K | I | C | R | E | L | - | - | - | - |
| 102 | SSEV (S)       | S | F | K | H | R | N | V | N | T | F | L | T | Y | P | K | C | H | L | E | P | E | A | V | G | L | H | L | W | S | L | I | G | H | W | N | P | A | - | Y | I | V | V | S | R | E | A | - | - | - | - |
| 103 | CabLCV (D)     | S | F | R | L | A | A | R | N | I | F | L | T | Y | P | Q | C | D | I | P | K | D | E | A | L | Q | M | L | Q | T | L | S | W | S | V | V | K | P | T | Y | I | R | V | A | R | E | E | - | - | - | - |
| 104 | ToYLDV (S)     | R | F | K | V | S | A | K | N | Y | F | L | T | Y | P | Q | C | S | L | T | K | E | E | A | L | S | Q | L | Q | N | L | E | T | P | V | N | K | K | - | F | I | K | I | C | R | E | L | - | - | - | - |
| 105 | ToLCLV (S)     | R | F | S | I | K | A | K | N | Y | F | L | T | Y | P | Q | C | S | L | T | K | E | E | A | L | S | Q | L | Q | T | L | Q | T | P | T | N | K | K | - | Y | I | K | I | C | R | E | L | - | - | - | - |
| 106 | USV (S)        | S | F | K | H | R | N | A | N | T | Y | L | T | Y | P | K | C | P | L | E | P | E | A | I | G | L | T | L | W | S | L | I | A | P | W | E | P | A | - | Y | I | I | V | C | R | E | A | - | - | - | - |
| 107 | ODV (N)        | R | F | R | V | Y | S | K | Y | L | F | L | T | Y | P | Q | C | I | L | E | P | Q | Y | A | L | D | S | L | R | S | L | L | Q | K | Y | K | P | L | - | Y | I | C | S | V | R | E | R | - | - | - | - |
| 108 | TbMoLCV (S)    | K | F | R | V | Q | S | R | N | Y | F | L | T | Y | P | Q | C | S | L | S | K | E | E | A | L | S | Q | L | Q | N | L | D | T | P | V | N | K | K | - | F | I | K | I | C | R | E | L | - | - | - | - |
| 109 | MaYMV (S)      | K | F | K | I | N | A | K | N | Y | F | L | T | Y | P | E | C | S | L | T | K | E | E | A | L | S | Q | L | Q | N | L | E | T | P | T | N | K | K | - | Y | I | K | I | C | R | E | L | - | - | - | - |
| 110 | SPLCSPV (RXXS) | R | F | N | I | K | A | K | N | Y | F | L | T | Y | P | Q | C | S | L | S | K | E | E | T | L | Q | Q | L | L | Q | L | Q | T | P | T | N | K | K | - | Y | I | K | I | C | R | E | L | - | - | - | - |
| 111 | PSLDV (S)      | R | F | R | V | N | C | R | N | F | F | L | T | Y | P | K | C | S | L | S | K | E |   |   |   |   |   |   |   |   |   |   |   |   |   |   |   |   |   |   |   |   |   |   |   |   |   |   |   |   |   |



|     |               |           |          |          |        |       |       |        |      |       |       |       |
|-----|---------------|-----------|----------|----------|--------|-------|-------|--------|------|-------|-------|-------|
| 136 | SpiYVSKV (S)  | SFCVNAKNI | FLTYFHT  | PIPIFIL  | LEILQS | INCP  | SDNP  | CFRVAQ | EK   | -     | -     | -     |
| 137 | DesLDV (D)    | TFRLAARNI | FLTYPQC  | DIPKDE   | ALQML  | QNSWS | SVVKP | VYIRV  | AREE | -     | -     | -     |
| 138 | MSRV (S)      | NFQFKSANA | FLTYPRC  | LLTPFE   | AGQHL  | WEVAR | PWTPS | -YIL   | ASSE | S     | -     | -     |
| 139 | JacMYuV (D)   | KFRLASRNI | FLTYPQC  | SLDKNH   | VLELL  | QNL   | PWTIV | VRPTY  | IRV  | ARE   | EI    | -     |
| 140 | MeYVMBaV (S)  | RNGIYSKDY | FVITYPK  | CSLTKE   | EALS   | SQLLN | LQTPT | TSKK   | -YIR | ICRE  | EL    | -     |
| 141 | SiMSiV (S)    | SFSVKARNY | FLTYPEC  | SLSKE    | EALS   | SQLLN | LKTPT | VNQK   | -FIR | VCRE  | EF    | -     |
| 142 | SiGMFlV (S)   | RFKINAKNY | FIITYPD  | CSSL     | SKEE   | ALS   | SQLQ  | NLS    | STP  | VNKK  | -FI   | KICRE |
| 143 | SiMoV (S)     | RFRVQAKNI | FLTYPQC  | SLTKE    | EALS   | SQLQA | IQLP  | SNKK   | -FI  | KICRE | EL    | -     |
| 144 | PouGMV (S)    | KFKLSAKNY | FLTYPQC  | SLSKE    | EALS   | QIRN  | LITPT | TNKK   | -YI  | KICRE | EL    | -     |
| 145 | EMSV (D)      | RFRISSKQL | FLTYPRC  | DLSPK    | DGL    | LELL  | QLLI  | QNK    | PK   | -YI   | HVTQ  | EL    |
| 146 | ToLCCNV (S)   | KFRINA    | KNYFLTY  | PHCSLT   | KEE    | ALS   | QIKT  | LETP   | VNKL | -FI   | RICRE | EL    |
| 147 | SiMBoV2 (S)   | RFVINA    | KNYFLTY  | PKCSLT   | KEE    | ALS   | SQLQ  | CIQT   | PTN  | KK    | -FI   | KIARE |
| 148 | BGYMV (S)     | RFRVQSKNY | FLTYPRC  | TIPKE    | EALS   | SQLQ  | KIHT  | TNTN   | KK   | -FI   | KVCE  | ER    |
| 149 | SbMMoV (S)    | YFCVKA    | KNI      | FLTY     | PRC    | SLTKE | EALS  | SQLQS  | IQC  | PSN   | KK    | -FI   |
| 150 | LYMV (S)      | QFQVKA    | KNI      | FLTF     | PKC    | PIPK  | EHML  | ELL    | RNI  | SC    | PS    | DKL   |
| 151 | ToLCTV (S)    | KFRINA    | KNYFLTY  | PHCSLT   | KEE    | ALS   | QIQAL | QTP    | TNKL | -FI   | RVCRE | EL    |
| 152 | JMINV (S)     | RFIINA    | KNYFLTY  | PRCSL    | SKE    | EALS  | QIKN  | LETP   | TNPK | -FI   | KICRE | EL    |
| 153 | PYMV (S)      | SFSIKA    | KNYFLTY  | PQCS     | ISKE   | EALS  | SQLQ  | NLT    | IPV  | NKK   | -FI   | KICRE |
| 154 | TYDV (N)      | SFRLQTKY  | VFLTY    | PRCSS    | SA     | ENLR  | DFL   | WDK    | LSR  | FA    | IF    | -FI   |
| 155 | MacYMV (S)    | RFRVSARNY | FLTYPH   | CSLSKE   | EALS   | SQLQ  | NI    | STP    | TNKK | -FI   | RICE  | EL    |
| 156 | ToChLPV (S)   | RFRLQAKNI | FLTYPQC  | PLTKE    | EAL    | DQLLS | IQLP  | SNKK   | -YI  | KICRE | EL    | -     |
| 157 | ToLCMYV (S)   | PFKINA    | KNYFLTY  | PQCSLT   | KE     | DALS  | SQLQ  | NLNT   | PTN  | KK    | -YI   | KICRE |
| 158 | MacGMV (S)    | SFSIKA    | KNYFLTY  | PQCSLT   | KEE    | ALS   | QLTN  | LNT    | PTV  | NKK   | -FI   | KICRE |
| 159 | TYLCYnV (S)   | RFQIYA    | KNYFLTY  | PQCSLT   | KEE    | ALS   | SQLQ  | NLQ    | PT   | TNKK  | -YI   | KICRE |
| 160 | CoGMV (S)     | RFRKQGV   | SFFLT    | TWPKC    | PVTKE  | SAL   | DQILA | LALP   | TNI  | I     | -YI   | RVCE  |
| 161 | OYCrV (S)     | RFKINS    | KNYFLT   | FPKCSL   | SKE    | EAL   | EQLN  | LQTP   | TNKK | -FI   | KICKE | EL    |
| 162 | RhGMHaV (S)   | RFRLNA    | KNYFLTY  | PKCSIS   | KE     | EAL   | GQLLS | IPTP   | VNKK | -FI   | KICKE | EL    |
| 163 | ToLCNDV3 (S)  | SFCVNAKNI | FLTYPKC  | PIPK     | EQMLE  | ILQS  | INCP  | SDKL   | -FI  | RVAQ  | EK    | -     |
| 164 | SpYVV (S)     | RFRVSARNY | FLTYPH   | CSLTKE   | EALS   | QLSN  | LVCPT | TNKK   | -FI  | KICRE | EL    | -     |
| 165 | RhMMV (S)     | RFRLNA    | KNYFLTY  | PKCSLT   | KE     | EALS  | SQLQ  | NLS    | STP  | VNKK  | -FI   | KICT  |
| 166 | EuLCuV (S)    | RFSIKA    | KNYFLTY  | PQCSLT   | KEE    | ALS   | SQLQ  | NLQ    | PT   | TNIK  | -FI   | KICRE |
| 167 | MCLMV (D)     | SFRVA     | AKNI     | FLTY     | PQCDIP | KDE   | ALKML | QELAW  | TVV  | KPKY  | IRV   | AREE  |
| 168 | ToLCSiV (S)   | RFKVS     | AKNYFLTY | PQCSLT   | KEE    | ALS   | SQLQ  | NLTI   | PVN  | KK    | -FI   | KICRE |
| 169 | ChiLCV (S)    | RFQIYA    | KNYFLTY  | PQCSLT   | KEE    | ALS   | SQLQ  | NLST   | PTN  | KL    | -FI   | RVSR  |
| 170 | ToLCPatV (S)  | VFRLNA    | KNYFLTY  | PKCSLT   | KEE    | ALS   | QLEN  | LQTP   | VNKK | -YI   | RVCRE | EL    |
| 171 | TbLCTHV (S)   | KFFINA    | KNYFLTY  | PQCSLT   | KEE    | ALS   | QISAL | STPT   | TNKL | -FI   | RICRE | EL    |
| 172 | SMLCuV (D)    | SFRFTARNI | FLTYPQC  | DIPKDE   | AIQML  | LEHL  | QWS   | SVVK   | PTY  | IRV   | AREE  | -     |
| 173 | ToLDV (S)     | RFKISS    | KNYFV    | TYPHCSLT | KEE    | ALA   | QKL   | LNT    | PTN  | KK    | -YI   | KICRE |
| 174 | ToCmMV (D)    | IFRLTARNI | FLTYPQC  | DIPKDE   | ALQML  | QSL   | PWS   | SVVK   | PTY  | IRV   | AREE  | -     |
| 175 | ToCSV (S)     | RFQINS    | KNYFV    | TYPKCSLT | KEE    | SLS   | SQLLN | LETP   | TNKK | -YI   | KICRE | EL    |
| 176 | EuYMV (D)     | SFRLTAKNI | FLTYPRC  | DIPKDE   | VLQL   | LRL   | PWS   | SVVK   | PTY  | IRV   | ARE   | EL    |
| 177 | PuYMV (S)     | RFSIKA    | KNYFLTY  | PQCSLT   | KEE    | ALS   | SQLK  | PLQT   | PTN  | KK    | -YI   | KICRE |
| 178 | SiYMCNV (S)   | RFLINA    | KNYFLTY  | PQCSLT   | KEE    | TLS   | SQLQ  | NLKT   | PT   | TNKK  | -FI   | KICRE |
| 179 | PepYLCCNV (S) | SFQVKA    | KNI      | FLTY     | PKC    | PIPK  | EQALE | LIQQ   | IACP | SDKL  | -FI   | RVAQ  |
| 180 | SPLCSiV1 (S)  | GFRLQAKNI | FLTYPKC  | PLSK     | ESVLE  | LLKGI | QCPS  | DKL    | -FI  | RVAQ  | EK    | -     |
| 181 | SPLCGV (S)    | GFRVSA    | KNYFLTY  | PKCSLS   | SK     | ETALE | LLKAI | NCPS   | DKL  | -FI   | RVSQ  | EE    |
| 182 | ToLCLKV (S)   | RFQIFA    | KNYFLTY  | PQCSLT   | KEE    | ALS   | SQLQ  | NLNT   | PTN  | KL    | -FI   | RICRE |
| 183 | MerMV (S)     | SFSIKA    | KNYFLTY  | PHCSLP   | KEE    | ALC   | QIKAL | QTP    | VNKK | -FI   | KICRE | EL    |
| 184 | EACMKV (S)    | RFSIKA    | KNYFLTY  | PKCSLS   | KEE    | EAL   | DQIR  | QLQTP  | TNKL | -FI   | KICRE | EL    |
| 185 | MacMPRV (S)   | RFRVSS    | KNYFLTY  | PRCSIS   | SK     | EETLS | SQLLN | NETP   | TNKK | -YI   | KICE  | EL    |
| 186 | MaYVYnV (S)   | RFKINA    | KNYFLTY  | PKCSLT   | KEE    | ALS   | SQLLN | LQTP   | TSIK | -FI   | RICRE | EL    |
| 187 | ToYSV (S)     | RFRISS    | KNYFLTY  | PRCSLS   | SK     | EETLS | SQLQ  | TINT   | PTN  | KK    | -FI   | KICRE |
| 188 | MacYSV (S)    | RFKIQS    | KNYFLTY  | PKCSIS   | SK     | EAL   | AQLLA | LALDTP | TNKK | -YI   | RVCRE | EL    |
| 189 | BYVMV (S)     | RFVINS    | KNYFLTY  | PQCSLN   | KEE    | ALS   | SQLQ  | NIQTP  | TNKK | -YI   | KICSE | EL    |
| 190 | ToLCDiV (S)   | RFLINCKNY | FLTYPQC  | SLTKE    | EALS   | SQLQ  | NLNT  | PTV    | NKK  | -YI   | KICRE | EL    |
| 191 | ToLCLwV (S)   | SFCVNAKNI | FLTYPKC  | HIPK     | EHML   | EIL   | PVNKL | PYLIN  | -YL  | SECH  | KKN   | -     |
| 192 | BChV (S)      | RFRINA    | KNYFLTY  | PQCSLT   | KDE    | ALS   | SQLQS | LET    | LVN  | KK    | -FI   | KVCRE |
| 193 | CoYV (S)      | LFKINA    | KNYFLTY  | PKCSLT   | KEE    | ALS   | SQLQ  | NLQTP  | TNKK | -FI   | KICRE | EL    |
| 194 | PHYVV (S)     | RFRLNA    | KNYFLTY  | PQCSIS   | SK     | EE    | RLAQL | QNLST  | PTV  | NKK   | -YI   | KICKE |
| 195 | ToLCAnV (S)   | RFKINA    | KNYFI    | TYPQCS   | ITKE   | EAL   | AQIK  | SFSYP  | TNIK | -FI   | RVCRE | EL    |
| 196 | ToLCMGV (S)   | RFSVKA    | KNYFLTY  | PNCSLS   | KEE    | EAL   | AQLQA | LQTP   | TNKL | -FI   | KICRE | EL    |
| 197 | TYLCTHV (S)   | KFLINA    | KNYFLTY  | PHCSLT   | KEE    | ALS   | QILN  | LSTPT  | TNKL | -FI   | RICRE | EL    |
| 198 | ChiLCINV (S)  | QFQVKA    | KNI      | FLTY     | PKC    | PIPK  | EQMLE | ELL    | KNV  | SC    | PS    | DKL   |
| 199 | SiGMV (S)     | KFRVQSKNY | LVTY     | PQCSLT   | KEE    | ALS   | SQLQS | LNT    | TVN  | KK    | -FI   | KICRE |
| 200 | SgYVV (S)     | KFRINA    | KNYFLTY  | PQCSLT   | KEE    | ALS   | SQLQ  | TLETP  | TNIL | -FI   | RICRE | EL    |
| 201 | SacSV (S)     | SFRHRNANT | FLTYSK   | CSLD     | PE     | ILGL  | SLWS  | KLAP   | WTPA | -YI   | LVARE | EA    |
| 202 | TbLCuCV (S)   | SSIANA    | KNYFLTY  | PQCSLT   | KEE    | ALS   | SQLQ  | KLNT   | PTV  | NKK   | -FI   | KICRE |
| 203 | AEV (S)       | RLKINA    | KNYFLTY  | PKCSLT   | KEE    | ALS   | SQLLN | LQPP   | TNKK | -YI   | KICRE | EL    |
| 204 | ToLCVV (S)    | KFRINA    | KNYFLTY  | PHCSLT   | KEE    | ALS   | SQLKN | LETP   | VNKL | -FI   | RICRE | EF    |



|     |                |                                                                  |
|-----|----------------|------------------------------------------------------------------|
| 205 | ClGMV (S)      | KFRINAKNYFLTYPQC SLTK EETL ARLLAI VTP TNKK -FIKICREL - - - -     |
| 206 | LaYVV (S)      | RFKIQARNYFLTYPHCSLTK EEALS QLKN IETPT TNKK -FIKICREL - - - -     |
| 207 | ToLCNDV (S)    | RFRINAKNYFLTYPKCSLTK EEALS QLQ TLETPT SSKK -FIKICREL - - - -     |
| 208 | SiYVV (S)      | RFRVQSKNYFLTYPQC SLTK EEALS QLENLQT P VNKK -FIKICREL - - - -     |
| 209 | ToLCNDV2 (S)   | RFVINAKNYFLTYPKCSLTK EEALS QIQNFQ TP T SSKK -YIKICREL - - - -    |
| 210 | SbCBV (S)      | AFRVNAKNI FLTYPRCSLSK DEALELLKG IPT P VNKK -FIKVAREL - - - -     |
| 211 | ToDfLV (S)     | RFRISSKNYFITYPHC SLSKEE ALS QLQKINTP TNKK -YIKICREL - - - -      |
| 212 | TGMV (RXXS)    | RFQINAKNYFLTYPQC SLSKEE ALS QLQALNTP INKK -FIKICREL - - - -      |
| 213 | ToMHaV (S)     | KFRVNSKNYFLTYPQC SITKEE ALS QIKNLNTP VNKK -FIKICREL - - - -      |
| 214 | SgYVGxV (S)    | KFLINARNYFLTYPHCSLTK EEALS QILALS TP TNKL -FVRICREL - - - -      |
| 215 | ToLCKeV (S)    | RFLINSKNYFLTYPKCSLTK EEALS QLQNLATP TNKK -YIKICREL - - - -       |
| 216 | SiYMV (S)      | AFRINSKNYFLTYPKCSLTK EEALS QLKELNTP T SSKK -FIRVSREL - - - -     |
| 217 | SPMV (S)       | RFKIQAKNYFLTYPHCSLSKEE VLDQLKKIQ TP VNKK -YIHIAREL - - - -       |
| 218 | ToLCCeV (S)    | KFQINAKNYFLTYPKCSLTK EEETL TQLQNL ETP TNKK -FIKICREL - - - -     |
| 219 | TGVV (S)       | RFTVNAKNFFLTYPHCSLTK EEETLS QLQTLK TP TNKK -FIRVTR EF - - - -    |
| 220 | SSMV1 (S)      | GFHFRGKNI FLTYSRCEID PALITDALWDKFS SHKPL -YILSVREL - - - -       |
| 221 | MerMPRV (S)    | RFRINAKNYFITYPKC SLTK EEALS QLQNLNTP VNKK -FIKICREL - - - -      |
| 222 | MiYLCV (S)     | RFRISAKNYFLTYPQC SLTK EEALS QLQNIQ TP TNKK -YIKICREL - - - -     |
| 223 | RhRGMV (S)     | RFKVSAKNYFITYPQC SLTK EEALS QLQNLATP VNKK -FIKICREL - - - -      |
| 224 | HgYMV (S)      | RFAINAKNYFLTYPRC PLTK EDTLEQLLALS TP VNKK -FIRICREL - - - -      |
| 225 | ToLCYTV (S)    | KFQINAKNI FLTYPQC TLSKEE TLS QIQNLSLP SNPK -FIKICREL - - - -     |
| 226 | PaLCuCNV (S)   | KFRINAKNYFLTYPHCSLTK EEALS QIKALGAP TNKF -FIRICREL - - - -       |
| 227 | ToLCJV (S)     | KFRINAKNYFLTYPKCSLAKEE ALS QLQNLDT P VNKL -FIRVCREL - - - -      |
| 228 | AbGMV (D)      | SFRLAAKNI FLTYPQC DLSKDEALQ MLQ TLSWS VVKPTY IRVAREE - - - -     |
| 229 | RaLCuV (S)     | QFQIYAKNYFLTYPKCSLTK EEALS QLQNLQT P VNKK -YIKICREL - - - -      |
| 230 | EuMV (D)       | SFRLQARNI FLTYPQC DVPKDEVLQ IIQHLPWS IVKPTY IRVAREE - - - -      |
| 231 | PSMV (M)       | CFKVRARNL FLTYSKCNLT AVF LLEYISSLK KYCPT -YIYVAQEA - - - -       |
| 232 | WGMV (S)       | RFKVSAKNYFITYPQC SLTK EEETLS QLQQLT TP VNKK -FIKICREL - - - -    |
| 233 | DDSMV (N)      | SFNVRSQHVF LTYPRCP IPPK DAGSFLKKLCK RYNIQ -YMYIAQEL - - - -      |
| 234 | AbMBV (D)      | SFRLQARNI FLTYPRCD IPKDEALQ MLQALS WT VVQPTY IRVAREE - - - -     |
| 235 | VeYVV (S)      | RFLINAKNYFLTYPHCSLTK EEETLS QIKNLET P TNKL -FIRVCREL - - - -     |
| 236 | ToYMLCV (S)    | AFKINAKNYFLTYPKCSLSKEE ALS QLQNLITP TNKK -FIKVCKEL - - - -       |
| 237 | WAAV1 (S)      | RFLINCKNYFLTYPQC PLTK EEALS QIINLS TP TNKL -FIKICREL - - - -     |
| 238 | MiSV (D)       | TPRWNSKQFFLTYPHCNLT PSELMKELFS RLTEKIPG -YIKVSQEF - - - -        |
| 239 | SiGMCRV (S)    | KFRVQSKNHFLTYPQC SLTK EEALS QLQNLATP VNKK -FIKICREL - - - -      |
| 240 | ToCMoV (S)     | HFRVNSKNYFLTYPHCSLSKEE ALS QLLALNTP TNKL -FIRVSREL - - - -       |
| 241 | CLCuBaV (S)    | RFLINSKNYFLTYPNCSLTK EEALS QLQNLQT P TNKK -FIKICREL - - - -      |
| 242 | ToLCPuV (RXXS) | RFNINSKNYFLTYPKCSLSKEE ALS QLQKLET P TSKL -FIRVCREL - - - -      |
| 243 | MaYMJV (S)     | RFKINAKNYFLTYPDCSLSKEE ALS QLQNLST P VNKK -FIKICREF - - - -      |
| 244 | MYMV (S)       | RFAINAKNYFLTYPRC PLTK EDVLEQLLALS TP VNKK -FIRVCREL - - - -      |
| 245 | ToLCRaV (S)    | RFKINAKNYFLTYPRCSLTK EEALS QLQ TLETPT SSKK -FIKICREL - - - -     |
| 246 | CpYV (N)       | SFRLQTKYVFLTYPHCS SSAEGLRDFLWDKLS RFAIF -FIAIATEL - - - -        |
| 247 | SoMBoV (S)     | RFRVQSKNYFLTYPHCSLSKEE ALS QLQALNCN INKK -FIRVCREL - - - -       |
| 248 | ToMoWV (S)     | RFKISSKNYFITYPKC SLTK EDALS QLQALQT P TNKK -FIKICREL - - - -     |
| 249 | EACMV (S)      | RFQINAKNYFITYPRC SLTK EEALS QLKAFAY PTNIK -FVRVCREL - - - -      |
| 250 | TbLRV (S)      | RFKSQPKTNFITYPQC SLPK EEALS QLQNL ETP VNKK -FIKICREL - - - -     |
| 251 | SiCMV (S)      | SFSIKAKNYFLTYPQC SLPK EEALEQIRVIQT P VNKK -FIKVAREL - - - -      |
| 252 | HemYMV (RXXS)  | RF SINAKNYFLTYPRCSLTK EEETIEQLRNLQ YPTNLK -YIKVCREL - - - -      |
| 253 | SPLCSCV (RXXS) | RFNIKAKNYFLTYPQC SLTK EEALDQLRNLNTP TNKK -FIKICREL - - - -       |
| 254 | TbYCV (S)      | RFRINAKNYFITYPKC SLTK EDALS QLQNLNTP VNKK -FIKVCREL - - - -      |
| 255 | PepGMV (D)     | SFRLQCKNI FLTYPQC DIPKDEALEMLRS LKWS VVKPSY IRVSREE - - - -      |
| 256 | CLCuKoV (S)    | RNGIYSKNYFITYPKC SLTK EEALS QLQNLNIQT P T SSKK -YIRICREL - - - - |
| 257 | SauLCuV (S)    | RFSIKAKNYFLTYPQC SLTK EEALS QIQNLK TP TNKK -YIKICREL - - - -     |
| 258 | ToLCGV (S)     | KFLINAKNYFLTYPQC SLTK EEALS LLQNLQT P TNKK -YIKICREL - - - -     |
| 259 | ToMMV (S)      | RFRINAKNYFLTYPKCSLTK EEALS QLQALEI PAQKK -FIKVAREL - - - -       |
| 260 | MaLCuV (S)     | RFSIKAKNYFLTYPEC SLTK EEALS QLQNLQT P TNIK -FIKICREL - - - -     |
| 261 | JYMINV (S)     | RFKLNAKNYFLTYPKCSLTK EEALS QFLNLQT P T SSKK -FIRICREL - - - -    |
| 262 | SLCuV (E)      | SFRLTARNI FLTYPRCDVPKEE VLGE LRILSVVSGKPNY VRVAREE - - - -       |
| 263 | OELCuV (S)     | RFLINSKNYFLTYPKCSLTK EEALS QIKNFQT P T SSKK -YIKICREL - - - -    |
| 264 | MaLCPHV (S)    | SFRINAKNFFLTYPDCSLTK DEEALS QLQNL TTP TNKK -YIKICREF - - - -     |
| 265 | HrCTV (D)      | SFRIQARNI FLTYPQC TIPKDEMLQLLQNLNWT VVKPTY IRVAAER - - - -       |
| 266 | ECSV (S)       | RFRIQGRAFFLTYSQCPREP KDVGEFLTSHSTLASHVYV RVQQEK - - - -          |
| 267 | HoLCV (S)      | QFQIYAKNYFLTYPTCSLTK EEALS QLQNLQT P VNKK -YIRICREF - - - -      |
| 268 | BYMMxV (S)     | KFLINAKNYFLTYPQC SLTK EEETLS QLQALNTP TNKK -YIKICREL - - - -     |
| 269 | JMV (S)        | SFSIKAKNYFLTYPQC SLTK EEALS QLQNLNTP INKK -FIKICREL - - - -      |
| 270 | EpYVV (S)      | RFKINAKNYFLTYPHCSLTK GEALS QIKQLQT P ISKK -FIRICREL - - - -      |
| 271 | EACMMV (S)     | RFQINAKNYFITYPRC SLTK EEALS QLQALSYP TNIK -FIRVCREL - - - -      |
| 272 | CToLCV (V)     | QFQVKAKNIFLTYPKCPIPK EQMLELLKNISCP SDKL -FIRVSQEK - - - -        |
| 273 | SiGMLaV (D)    | SFRLAARNI FLTYPQC DIAKDEALQ MLQ TLPWS VVKPTY IRVAREE - - - -     |
| 274 | RhYMIV (S)     | RFKINAKNYFLTYPRC TLSKEAAL EQLLAISTP VNKK -FIRICREL - - - -       |



275 TbLCYnV (S) R F K I Q A K N Y F L T Y P Q C S L S N K E E A L S Q L Q A L E T P T N K K - Y I K I C R E L - - - -

276 TYLCMLV (S) R F K I N A K N Y F L T Y P Q C S L S I S E E A L S Q L Q T L E T P V K K L - Y I K I C R E F - - - -

277 SeYMV (S) R F Q I N A K N Y F L T Y P H C S L T K E E A L S Q I K N L K T P I N K K - F I K I C R E L - - - -

278 RoLCuV (S) A F R I N A K N Y F L T Y P K C S L T K E E A L Y Q L Q N I H T P V N K K - F I R I C R E L - - - -

279 SPLCCV (S) G F R V Q A K N I F L T Y P K C S L S K E Q A L E Q L R A T H C P S D K L - F I R V S Q E K - - - -

280 ToLCPV (S) P F K I N A K N Y F L T Y P Q C S L T K E D A L S Q L Q N L N T P T N K K - F I K I C R E L - - - -

281 SCTAV (A) Y F R F Q K K N A F L T Y S Q I G G D F K D Y I F E K L L A L L Q Q F E V L F L S V A L E H H Q P T

282 SPLCCNV (S) R F R V S S K N Y F I T Y P R C S L S K E D A L E Q I L K I N T P T N K K - Y I H I A R E L - - - -

283 BCaMV (D) S F R I T A R N I F L T Y P Q C D I N K D E A L R L L Q E L P W S V V K P T Y I R V A R E E - - - -

284 DiYMoV (S) V F S I K A K N Y F L T Y P Q C S L S K E E A L Q Q L I N L K T P T N K K - F I K I A R E L - - - -

285 CLCuGeV (S) R F Q I Y A K N Y F L T F P K C S L T K E E A L E Q L Q Q I S T A S N K K - Y I K I C R E L - - - -

286 BoYSV (S) R F R L Q A K N I F L T Y P K C S L T K E A A L Q Q I R S L Q L P S N K K - Y I K I C R E L - - - -

287 MerLCV (S) S F R V S A K N V F L T Y P K C S L S K E T A L E L L K I V N C P S D K V - F I R V S Q E K - - - -

288 SiLCuV (S) R F N I Y C K N Y F L T Y P K C S L T K E E T L S Q I Q N L N T P T N K K - Y I K V C R E L - - - -

289 ALYVV (S) Q F R L N R K N F F L T Y S Q C P I S K E E A L Q Q L I N T Q T P V N K K - F I R V C K E L - - - -

290 MYMIV (S) R F A I N A R N Y F L T Y P K C P L T K E D A L E Q L L A L S T P V N K K - F I R I C R E L - - - -

291 ToBYMoV (D) T F R L Q A R N I F L T Y P Q C D I E K H E V L Q M L Q L L T G T V V K P T Y I G V A R E E - - - -

292 CpRLV (N) N F R F Q S K Y V F L T Y P H C N S N P E A L R D Y L W E K L T R F I I F - F I A V A S E V - - - -

293 ToLCSCV (S) G F R V S A K N I F L T Y P K C S L S K E I A L E L L K A I K C P S D K L - F I R V S Q E K - - - -

294 BDMV (S) K F R V Q S R N Y F L T Y P Q C S L T K E E A L S Q I Q N L K T P V N K K - F I K I C R E L - - - -

295 RhyMV (S) R F C I N A K N Y F L T Y P R C P L S K E E T L S Q L L A L Q T P T N K K - F I R V S R E L - - - -

296 SiYLCV (D) K F R L A A K N I F L T Y P Q C D I P K D E A L Q M L Q S L P W S V V K P T Y I R V A R E E - - - -

297 ToGMoV (S) R F R L Q A K N I F L T Y P L C S L T K D E A L E Q L Q S I Q L T S N K R - Y I K I C R E L - - - -

298 PepYLCIV (S) R F K L Q S K N Y F L T Y P H C S L T K E E A L E Q L K S F N T P V N K L - F V K I C R E L - - - -

299 BChMV (S) K F R V Q S K N Y F L T Y P Q C S L T K E E A L S Q I Q N L A T P V N K K - F I K I C R E F - - - -

300 SiMoAV (S) S F C I K A K N Y F L T F P R C S L T K E E A L S Q I L N L K T P V N K K - F I K I C R E L - - - -

301 ToYVSV (S) R F L V N A K N F F L T Y P H C S L T K D E A L S Q L Q A L Q T P T N K K - F I R V T R E L - - - -

302 TbCSV (S) K F R I N A K N Y F L T Y P H C S L T K E E A L S Q I Q A L E T P T N K L - F I R I C R E L - - - -

303 CeYSV (S) R F R L Q A K N I F L T Y P Q C S I S K E A A L S Q L Q T L S L P S N K K - Y I K I C R E L - - - -

304 CoYVV (S) R F V K T A S S F F L T W P R C P I N K E S A L E Q I K T L S L P T N I V - Y I R V C E E K - - - -

305 ToSLCV (D) L F R L A A K N I F L T Y P Q C D I P K D E A I E M L Q N L P W S V V K P T Y I R V A R E E - - - -

306 CLCuAlV (S) S F C I N A K N I F L T F P K C P I P K E Q M L D I L S N I S C P S D K L - F I R V A Q E K - - - -

307 SSV (S) R F K H R N V N T F L T Y S R C P L E P E A V G L H I W S L I A H W T P V - Y V L S V R E T - - - -

308 SSRV (S) - F K H R N A N T F L T Y S R C R L D P E A V G L I L W Q L I S H W S P A - Y I L V S R E A - - - -

309 SbBMV (S) - - - M L P K T I L S H I L D V L S P K K T H F P N Y K P Y R T P T N K K - F I K I C R E L - - - -

310 SiYBV (S) P F K I N A K N Y F L T Y P Q C S L T K E E A L S Q L L N L S I P T N K K - F I K I A R E L - - - -

311 PepYVMLV (S) R F K I S S K N Y F L T F P K C S L T K E E A L E Q L L N L S T P T N T K - F I K V C R E L - - - -

312 CaYMV (S) Q F Q V K A K N I F L T Y P K C P L P K E Q M L E L L K N I S C P S D K L - F I R V S Q E K - - - -

313 ESV (S) R F K H R N V N T F L T Y P H C T L E P E V V G L V L W S L L E S W T P A - Y I V V S R E A - - - -

314 EuLGxCV (S) K F L I N A K N Y F L T Y P H C S L T K E E A L S Q L Q N L E T P T N K K - F I R I C R E L - - - -

315 SLCCNV (S) S F K I N A K N Y F L T Y P K C S L T K E E A L S Q L Q T L E T P T S K K - F I K I C R E L - - - -

316 ToLCMLV (S) R F S I K A K N Y F L T Y P Q C S L T K K E A L S Q L Q N L Q T P T N K K - F I K I C R E L - - - -

317 BGMV (S) R F K I N A K N Y F L T Y P Q C S I T K E S A I E Q L Q N L Q T P V N K K - Y I R I C R E I - - - -

318 SpSCTV (D) S F R L S S K N I F L T Y P Q C D I P K D E V L Q L L Q N L P W S V V K P T Y I R V A S E R - - - -

319 BLYSV (S) R F R I Q S K N Y F L T Y P K C S I P K E E A L T Q L L A L D T P T N K K - Y I R V C R E L - - - -

320 ChiLCKV (S) S F C V N A K N I F L T Y P K C P I P K E Q M L E L L Q S I N C P S D K L - F I R V A Q E K - - - -

321 SLCMV (S) R F R I Q S K N I F L T Y P K C S L T K E H L L E F F R S L S L P T N I K - F I K I C R E L - - - -

322 MeYVMV (S) R N G I Y S K N Y F V T Y P K C S L T K E E A L S Q L L N L Q T P T S K K - Y I K I C R E L - - - -

323 SiMMV (S) R F K I S A K N Y F L T Y P Q C S L T K E E T L S Q L Q S L S T P V N K K - F I K I C R E L - - - -

324 RhGMV (S) R F R L N A K K Y F L T Y P Q C S I S K E E A L E Q I Q R L S T P V N K K - F I K I C R E T - - - -

325 SiGMBRV (S) R F K V N A K N Y F L T Y P D C S I A K E T A L E Q L I N L E T P S K K K - Y I R V C R E F - - - -

326 SiGMoV (S) S F S V K A K N Y F L T Y P Q C S I T K E E A L S Q L Q T L N T P V N K K - F I K I C R E L - - - -

327 CarYSYV (D) S F R L Q A N N I F L T Y A Q C D I P K D E A L Q M L Q S L H W A I V K P L Y I R V S R E E - - - -

328 BYVBhV (T) R F Q I N A K N Y F L T Y P K C S L T K E E A L S Q F L N L Q T P T N K K - F I R I C R E L - - - -

329 TYLCIDV (S) R F Q I N A K N Y F L T Y P H C S L S K S E A L S Q I R N L N T P T N K K - Y I K I C S E L - - - -

330 ToLCBaV (KXXS) R F N I N A K N Y F L T Y P K C S L S K E R H L S Q L Q T V K T P T S K L - F I R V C R E L - - - -

331 TYLCKaV (S) K F R I N A K N Y F L T Y P Q C S L S K E E T L S Q L K E L Q T P T S K K - Y I K I C R E L - - - -

332 ChiLCVV (S) R F Q V L A K N I F L T Y P K C P I P K E Q M L E L L K G I S C P S D K L - F I R I S Q E K - - - -

333 DoYMV (S) G F R I S A R N I F L T Y P K C S L S K E E A L E Q L C R I E C P S D K L - F I R V A Q E A - - - -

334 CdTV (S) R F K V S A K N Y F L T Y P Q C S L S K E E A L S Q L Q T L K T P V N K K - Y I K I C R E L - - - -

335 ToLCMiV (S) K F Q I N A K N Y F L T Y P Q C S L T K E E A L S Q I Q N I Q T P T N K K - Y I R I C R E L - - - -

336 ToLCJaV (S) R F L I N A K N Y F L T Y P Q C S L T K E E A L S Q L Q N L N T P T N K K - F I K I C R E L - - - -

337 OMoV (S) R F R L Q A K N I F L T Y P Q C S L T K E E A L S Q L Q A I Q L P S N K K - F I K I C R E L - - - -

001 AllLCV (S) - - H E D G S P H L H V L V Q F E G K F N C T N Q R F F D L V S P T R S T - H F H P N I Q G A K S S

002 TbLCZV (S) - - H E N G E P H L H V L I Q F E G K F N C K N H R F F D L V S P T R S A - H F H P N I Q G A K S S

003 TbLCPuV (S) - - T K N G S P H L H V L I Q F E G K Y K C Q N N R F F D L V S P T R S A - H F H P N I Q G A K S S

004 CraYVV (S) - - H E D G T P H L H I L I Q F E G K F Q C K N Q R F F D L I S P N R S A - H F H P N I Q G A K S S



|     |              |    |   |   |   |   |   |   |   |   |   |   |   |   |   |   |   |   |   |   |   |   |   |   |   |   |   |   |   |   |   |   |   |   |   |   |   |   |   |   |   |   |   |   |   |   |   |   |   |   |
|-----|--------------|----|---|---|---|---|---|---|---|---|---|---|---|---|---|---|---|---|---|---|---|---|---|---|---|---|---|---|---|---|---|---|---|---|---|---|---|---|---|---|---|---|---|---|---|---|---|---|---|---|
| 005 | SiYMAV (S)   | -- | H | D | D | G | H | P | H | L | H | V | L | I | Q | F | E | G | K | F | K | C | Q | N | N | R | F | F | D | L | V | S | P | T | R | S | A | - | H | F | H | P | N | I | Q | G | A | K | S | S |
| 006 | EYVV (S)     | -- | H | E | D | G | T | P | H | L | H | V | L | I | Q | F | E | G | K | F | K | C | Q | N | N | R | F | F | D | L | I | S | P | N | R | S | A | - | H | F | H | P | N | I | Q | G | A | K | S | S |
| 007 | ToLCBV (S)   | -- | H | E | N | G | E | P | H | L | H | V | L | I | Q | F | E | G | K | F | K | C | Q | N | N | R | F | F | D | L | V | S | T | T | R | S | A | - | N | F | H | P | N | I | Q | G | A | K | S | A |
| 008 | SiGMBuV (S)  | -- | H | E | N | G | E | P | H | L | H | V | L | I | Q | F | E | G | K | Y | Q | C | T | N | N | R | F | F | D | M | V | S | P | T | R | S | V | - | H | F | H | P | N | I | Q | G | A | K | S | S |
| 009 | LuYVV (S)    | -- | H | S | D | G | T | L | H | L | H | A | L | I | Q | F | K | G | K | A | Q | F | R | N | P | R | H | F | D | I | T | H | P | N | T | S | S | - | Q | F | H | P | N | F | Q | G | A | K | S | S |
| 010 | WDIV (N)     | -- | H | Q | D | G | T | P | H | L | H | A | L | L | Q | T | R | K | Q | I | S | T | N | D | P | H | F | F | D | - | - | F | D | G | - | - | - | - | H | H | P | H | I | Q | A | A | K | N | P |   |
| 011 | CSMV (Q)     | -- | H | A | D | G | E | P | H | L | H | A | F | V | Q | L | E | A | N | F | R | T | T | S | P | K | Y | F | D | - | - | L | D | E | - | - | - | - | F | H | P | N | I | Q | A | A | R | Q | P |   |
| 012 | PouMGDV (S)  | -- | H | E | D | G | S | P | H | L | H | V | L | L | Q | F | E | G | K | Y | N | C | T | N | Q | R | F | F | D | L | V | S | T | T | R | S | A | - | H | F | H | P | N | I | Q | G | A | K | S | S |
| 013 | PaLCuGdV (S) | -- | H | E | D | G | S | P | H | L | H | V | L | I | Q | F | E | G | K | F | R | C | T | N | Q | R | F | F | D | L | V | S | P | T | R | S | A | - | H | F | H | P | N | I | Q | G | A | K | S | S |
| 014 | SiGYVV (S)   | -- | H | Q | N | G | K | P | H | L | H | V | L | M | Q | F | E | G | K | Y | A | C | E | N | N | R | L | F | D | L | V | S | P | T | R | S | A | - | H | F | H | P | N | I | Q | G | A | K | S | S |
| 015 | CLCrV (D)    | -- | H | S | D | G | F | P | H | L | H | C | L | I | Q | L | S | G | K | S | N | I | K | N | K | R | F | F | D | L | T | H | P | R | R | S | T | - | N | F | H | P | N | I | Q | A | A | K | D | A |
| 016 | ToLCSuV (S)  | -- | H | Q | D | G | S | L | H | I | H | A | L | V | Q | F | K | G | K | A | K | F | R | N | A | R | H | F | D | I | S | H | P | N | S | S | R | - | S | F | H | P | N | F | Q | G | A | R | S | S |
| 017 | CPGMV (S)    | -- | H | E | D | G | E | P | H | L | H | V | L | L | Q | F | E | G | K | L | Q | I | T | N | P | R | L | F | D | L | V | S | G | N | R | S | A | - | V | F | H | P | N | I | Q | G | A | K | S | S |
| 018 | AYVSLV (S)   | -- | H | E | D | G | T | P | H | L | H | V | L | I | Q | F | E | G | K | F | Q | C | R | N | N | R | F | F | D | L | T | S | P | T | R | S | A | - | H | F | H | P | N | I | Q | G | A | K | S | S |
| 019 | SiGMBcV (S)  | -- | H | Q | N | G | N | P | H | L | H | V | L | V | Q | F | E | G | K | Y | Q | C | T | N | N | R | F | F | D | L | V | S | P | N | R | S | T | - | H | F | H | P | N | I | Q | G | A | K | S | S |
| 020 | DaLDV (S)    | -- | H | E | N | G | D | P | H | I | H | M | L | I | Q | F | E | G | K | Y | Q | C | T | N | N | R | F | F | D | L | V | S | P | S | R | S | T | - | H | F | H | P | N | I | Q | G | A | K | S | S |
| 021 | ToLCToV (S)  | -- | H | E | D | G | E | P | H | L | H | M | L | I | Q | F | E | G | K | F | H | C | T | N | N | R | F | F | D | L | V | S | P | T | R | S | A | - | H | F | H | P | N | I | Q | G | A | K | S | S |
| 022 | ToLCNDV4 (S) | -- | H | V | D | G | F | R | H | I | Q | V | V | I | Q | F | E | G | K | F | H | C | K | N | N | R | C | L | E | L | V | S | P | S | R | S | A | - | H | F | H | P | D | I | Q | G | A | K | S | S |
| 023 | TCTV (S)     | -- | H | D | N | G | E | P | H | L | H | V | L | I | Q | F | E | G | K | I | Q | L | Y | N | P | R | H | F | D | L | R | D | G | G | S | G | R | - | I | C | H | P | N | I | Q | G | A | K | S | S |
| 024 | TYLCMaIV (S) | -- | H | E | N | G | E | P | H | L | H | V | L | I | Q | F | E | G | K | F | K | C | Q | N | Q | R | F | F | D | L | V | S | P | S | R | A | A | - | H | F | H | P | N | I | Q | G | A | K | S | S |
| 025 | TYLCAxV (S)  | -- | H | E | N | G | E | P | H | L | H | V | L | I | Q | F | E | G | K | Y | Q | C | K | N | Q | R | F | F | D | L | V | S | P | N | R | S | A | - | H | F | H | P | N | I | Q | A | A | K | S | S |
| 026 | SiYVVV (S)   | -- | H | E | D | G | S | P | H | L | H | V | L | I | Q | F | E | G | K | Y | V | C | T | N | N | R | F | F | D | L | V | S | P | T | R | S | A | - | H | F | H | P | N | I | Q | G | A | K | S | S |
| 027 | PepLCV (S)   | -- | H | E | D | G | T | P | H | L | H | I | L | I | Q | F | E | G | K | F | Q | C | K | N | P | R | F | F | D | L | T | S | P | T | R | S | A | - | H | F | H | P | N | I | Q | G | A | K | S | S |
| 028 | DaChMV (S)   | -- | H | E | N | G | E | P | H | L | H | V | L | I | Q | F | E | G | K | Y | Q | C | A | N | E | R | F | F | D | L | V | S | P | T | R | S | A | - | H | F | H | P | N | I | Q | G | A | K | S | A |
| 029 | VBSMV (S)    | -- | H | E | D | G | V | P | H | L | H | V | L | L | Q | F | E | G | K | F | Q | C | R | N | Q | R | F | F | D | L | H | A | E | T | R | A | T | - | H | F | H | P | N | I | Q | G | A | K | S | S |
| 030 | SSMV2 (S)    | -- | H | S | D | G | D | Y | H | L | H | C | L | F | Q | L | D | K | A | F | S | T | N | D | S | S | T | F | N | - | - | I | L | D | - | - | - | - | Y | H | P | N | I | Q | T | A | K | S | P |   |
| 031 | ToMoLCV (S)  | -- | H | E | D | G | E | P | H | L | H | V | L | I | Q | F | E | G | K | L | Q | C | T | N | E | R | L | F | D | L | I | S | P | T | R | S | A | - | H | F | H | P | N | V | Q | G | A | K | S | S |
| 032 | BCTIV (A)    | EE | Q | P | E | G | G | F | H | T | H | C | I | I | Q | C | D | K | K | L | D | V | N | G | N | L | F | F | N | I | I | L | P | D | G | R | T | - | - | I | H | P | R | I | D | G | L | N | A | P |
| 033 | PepLCLaV (S) | -- | H | Q | D | G | S | L | H | I | H | A | L | I | Q | F | K | G | K | S | K | F | R | N | P | R | H | F | D | V | T | H | P | N | N | S | T | - | Q | F | H | P | N | F | Q | G | A | K | S | S |
| 034 | KuMV (S)     | -- | H | E | N | G | E | P | H | L | H | V | L | L | Q | F | E | G | K | F | Q | C | R | N | E | R | F | F | D | L | V | S | E | T | R | S | A | - | H | F | H | P | N | I | Q | G | A | K | S | S |
| 035 | CoYSV (S)    | -- | H | E | N | G | E | P | H | L | H | V | L | I | Q | F | E | G | K | Y | N | C | T | N | N | R | F | F | D | L | V | S | P | T | R | S | I | - | H | F | H | P | N | I | Q | G | A | K | S | S |
| 036 | ChiLCPKV (S) | -- | H | H | D | G | S | L | H | I | H | A | L | I | Q | F | K | G | K | S | Q | F | R | N | P | R | H | F | D | V | T | H | P | N | N | T | T | - | Q | F | H | P | N | F | Q | G | A | K | S | S |
| 037 | JLCuV (S)    | -- | H | E | D | G | S | L | H | I | H | A | L | I | Q | F | K | G | K | A | R | F | R | N | A | R | H | F | D | L | I | H | P | H | S | S | S | - | Q | F | H | P | N | I | Q | G | A | K | S | S |
| 038 | ErYMV (S)    | -- | H | E | D | G | T | P | H | L | H | I | L | I | Q | F | E | G | K | F | Q | C | K | N | Q | R | F | F | D | L | I | S | P | T | R | S | A | - | H | F | H | P | N | I | Q | G | A | K | S | S |
| 039 | CLCuMuV (S)  | -- | H | E | N | G | E | P | H | L | H | V | L | I | Q | F | E | G | K | Y | K | C | Q | N | Q | R | F | F | D | L | V | S | P | T | R | S | A | - | H | F | H | P | N | I | Q | G | A | K | S | S |
| 040 | PaLCuV (S)   | -- | H | Q | D | G | S | L | H | I | H | A | L | I | Q | F | K | G | K | S | K | F | R | N | T | R | H | F | D | V | T | H | P | N | N | S | T | - | Q | F | N | P | N | F | Q | G | A | K | S | S |
| 041 | ToMoTaV (S)  | -- | H | E | N | G | E | P | H | L | H | V | L | V | Q | F | E | G | K | Y | N | C | T | N | N | R | F | F | D | V | V | S | P | T | R | S | A | - | H | F | H | P | N | I | Q | G | A | K | S | S |
| 042 | ToCLLDV (S)  | -- | H | E | N | G | E | P | H | L | H | I | L | I | Q | F | E | G | K | Y | Q | C | T | N | N | R | F | F | D | L | V | S | P | T | R | S | A | - | H | F | H | P | N | I | Q | G | X | K | S | S |
| 043 | SPLCV (S)    | -- | H | E | D | G | E | P | H | L | H | V | L | V | Q | F | E | G | K | F | V | C | T | N | S | R | F | F | D | L | V | S | P | N | R | S | N | - | H | F | H | P | N | I | Q | G | A | K | S | S |
| 044 | CLYMV (S)    | -- | H | R | D | G | S | L | H | L | H | A | L | I | Q | F | K | G | K | A | K | F | R | N | E | R | H | F | D | V | T | H | P | N | T | S | S | - | Q | F | H | A | H | I | Q | G | A | R | S | S |
| 045 | ToLCV (G)    | -- | H | E | N | G | E | P | H | L | H | V | L | I | Q | F | E | G | K | Y | V | C | T | N | Q | R | F | F | D | L | V | S | P | T | R | S | A | - | H | F | H | P | T | I | Q | G | A | K | G | S |
| 046 | MaYMHcV (S)  | -- | H | E | N | G | E | P | H | L | H | V | L | M | Q | L | E | G | K | F | N | C | T | N | N | R | L | F | D | M | V | S | P | T | R | S | A | - | P | F | H | P | N | I | Q | G | A | R | S | S |
| 047 | ToYMoV (S)   | -- | H | E | D | G | E | P | H | L | H | V | L | I | Q | L | E | G | K | V | Q | I | Y | N | Q | K | L | F | D | L | S | S | T | S | R | S | A | - | Y | F | H | P | N | I | Q | G | A | K | S | S |
| 048 | WmCSV (S)    | -- | H | Q | N | G | E | P | H | L | H | V | L | L | Q | F | A | G | K | I | T | I | T | D | N | R | L | F | D | H | V | H | P | S | R | S | A | - | C | F | H | P | N | I | Q | S | A | K | S | S |
| 049 | ToLCHaV (S)  | -- | H | E | D | G | S | P | H | L | H | V | L | I | Q | F | E | G | K | F | Q | C | R | N | Q | R | F | F | D | L | I | S | Q | T | R | S | A | - | H | F | H | P | N | I | Q | G | A | K | S | S |
| 050 | CuLCuV (D)   | -- | H | S | D | G | F | P | H | L | H | C | L | I | Q | L | S | G | K | S | N | I | K | D | A | R | F | F | D | L | A | H |   |   |   |   |   |   |   |   |   |   |   |   |   |   |   |   |   |   |



|     |                |    |   |   |   |   |   |   |   |   |   |   |   |   |   |   |   |   |   |   |   |   |   |   |   |   |   |   |   |   |   |   |   |   |   |   |   |   |   |   |   |   |   |   |   |   |   |   |   |   |
|-----|----------------|----|---|---|---|---|---|---|---|---|---|---|---|---|---|---|---|---|---|---|---|---|---|---|---|---|---|---|---|---|---|---|---|---|---|---|---|---|---|---|---|---|---|---|---|---|---|---|---|---|
| 075 | SLCuPV (S)     | -- | H | E | D | G | S | P | H | L | H | V | L | I | Q | F | E | G | K | F | V | C | T | N | N | R | F | F | D | L | V | S | P | N | R | S | A | - | H | F | H | P | N | I | Q | G | A | K | S | S |
| 076 | MCLCuV (D)     | -- | H | S | D | G | F | P | H | L | H | C | L | V | Q | L | S | G | K | S | N | I | K | D | A | G | F | F | D | L | T | H | P | R | R | S | A | - | R | F | H | P | N | I | Q | G | A | K | D | T |
| 077 | ToLCHaiV (S)   | -- | H | E | D | G | S | P | H | L | H | V | L | I | Q | F | E | G | K | Y | V | C | T | N | N | R | F | F | D | L | V | S | P | N | R | S | A | - | H | F | H | P | N | I | Q | G | A | K | S | S |
| 078 | ChaYMV (S)     | -- | H | E | D | G | Q | P | H | L | H | A | L | I | Q | F | E | G | K | Y | K | C | Q | N | Q | R | F | F | D | L | V | S | P | T | R | S | T | - | H | F | H | P | N | V | Q | G | A | K | S | C |
| 079 | TYLCSV (S)     | -- | H | E | N | G | E | P | H | L | H | I | L | I | Q | F | E | G | K | Y | N | C | T | N | Q | R | F | F | D | L | V | S | P | T | R | S | A | - | H | F | H | P | N | I | Q | G | A | K | S | S |
| 080 | MacYMFV (S)    | -- | H | E | N | G | Q | P | H | I | H | V | L | I | Q | F | E | G | K | Y | Q | C | T | N | Y | R | F | F | D | L | V | S | P | S | Q | S | A | - | Y | F | H | P | N | V | Q | G | A | K | S | S |
| 081 | ChLCV (D)      | -- | H | A | D | G | F | P | H | L | H | C | L | I | Q | L | S | G | K | S | N | I | K | D | A | R | F | F | D | L | T | H | P | R | R | S | A | - | G | F | H | P | N | V | Q | G | A | K | D | T |
| 082 | JMNV (S)       | -- | H | Q | N | G | E | P | H | L | H | V | L | V | Q | F | E | G | K | V | R | L | T | N | C | R | L | F | D | L | V | S | P | T | R | S | A | - | H | F | H | P | N | I | Q | G | A | K | S | S |
| 083 | WDV (D)        | -- | H | E | D | G | S | P | H | L | H | V | L | V | Q | N | K | L | R | A | S | I | T | N | P | N | A | L | N | L | R | M | N | T | S | P | F | S | I | F | H | P | N | I | Q | A | A | K | D | C |
| 084 | AbMBoV (S)     | -- | H | E | D | G | Q | P | H | L | H | V | L | L | Q | F | E | G | K | Y | N | C | Q | N | K | R | F | F | D | L | V | S | P | H | S | S | T | - | Q | F | H | G | N | Y | Q | G | A | R | S | S |
| 085 | SPLCHnV (S)    | -- | H | Q | D | G | S | L | H | L | H | A | L | I | Q | F | K | G | K | C | Q | F | T | N | P | R | H | F | D | L | T | H | P | N | S | S | T | - | Q | Y | H | P | N | F | Q | S | A | K | S | S |
| 086 | CleLCrV (S)    | -- | H | D | N | G | E | P | H | L | H | V | L | L | Q | F | E | G | K | F | K | C | Q | N | Q | R | F | F | D | L | V | S | P | S | R | S | A | - | H | F | H | P | N | V | Q | G | A | K | S | S |
| 087 | ToLCHsV (S)    | -- | H | E | D | G | S | P | H | L | H | V | L | I | Q | F | E | G | K | Y | K | C | Q | N | N | R | F | F | D | L | V | S | P | T | R | S | T | - | H | F | H | P | N | I | Q | G | A | K | S | S |
| 088 | SiYMYuV (S)    | -- | H | E | N | G | E | P | H | L | H | I | L | L | Q | F | E | G | K | Y | Q | C | T | N | N | R | F | F | D | L | V | S | P | T | R | S | I | - | H | F | H | P | N | I | Q | G | A | K | S | S |
| 089 | SPLCUV (RXXS)  | -- | H | E | N | G | E | P | H | L | H | V | L | L | Q | F | E | G | N | Y | Q | C | T | N | Q | R | F | F | D | L | V | S | P | S | R | S | T | - | H | F | H | P | N | I | Q | R | A | K | S | S |
| 090 | ToLCGdV (S)    | -- | H | K | N | G | N | P | H | L | H | V | L | M | Q | F | E | G | K | Y | N | C | T | N | N | R | F | F | D | L | V | S | P | T | R | S | T | - | H | F | H | P | N | I | Q | G | A | K | S | S |
| 091 | EACMZV (S)     | -- | H | D | D | G | Q | P | H | L | H | M | L | I | Q | F | E | G | K | F | S | C | T | N | K | R | F | F | D | L | V | S | P | T | R | S | T | - | H | F | H | P | N | I | Q | G | A | K | S | S |
| 092 | ToMYLCV (D)    | -- | H | R | D | G | F | P | H | L | H | C | L | I | Q | L | S | G | K | S | N | I | K | D | A | R | F | F | D | I | T | H | P | R | R | S | A | - | C | F | H | P | N | I | Q | A | A | K | D | T |
| 093 | SACMV (S)      | -- | H | E | N | G | E | P | H | L | H | A | L | I | Q | F | E | G | K | Y | N | C | T | N | P | R | F | F | D | L | I | S | P | S | R | S | A | - | H | F | H | P | N | I | Q | G | A | K | S | S |
| 094 | ToLDeV (S)     | -- | H | E | D | G | Q | H | H | L | H | V | L | L | Q | F | Q | G | K | F | Q | C | K | N | N | R | F | F | D | L | V | S | P | T | R | S | T | - | H | F | H | P | N | V | Q | G | A | K | S | S |
| 095 | ToMoV (S)      | -- | H | E | N | G | E | P | H | L | H | V | L | V | Q | F | E | G | K | Y | Q | C | T | N | N | R | F | F | D | L | V | S | P | T | R | S | A | - | H | F | H | P | N | I | Q | G | A | K | S | S |
| 096 | TPCTV (S)      | -- | H | E | N | G | E | P | H | L | H | V | L | I | Q | F | E | G | K | F | N | C | K | N | Q | R | F | F | D | L | V | S | P | T | R | S | T | - | H | F | H | P | N | I | Q | G | A | K | S | S |
| 097 | TYLCV (S)      | -- | H | E | N | G | E | P | H | L | H | V | L | I | Q | F | E | G | K | Y | Q | C | K | N | Q | R | F | F | D | L | V | S | P | N | R | S | A | - | H | F | H | P | N | I | Q | A | A | K | S | S |
| 098 | ViYMV (D)      | -- | H | A | D | G | F | P | H | L | H | C | L | I | Q | L | S | G | K | P | S | I | K | D | A | R | F | F | D | I | T | H | P | R | R | S | T | - | R | F | H | P | N | I | Q | A | A | K | D | S |
| 099 | DCSMV (M)      | -- | H | Q | D | G | T | F | H | L | H | C | F | V | Q | C | K | K | H | V | R | T | T | R | A | R | F | F | D | - | - | L | E | E | - | - | - | - | Y | H | P | N | V | Q | N | A | R | M | P |   |
| 100 | ACMV (S)       | -- | H | Q | N | G | E | P | H | L | H | A | L | I | Q | F | E | G | K | I | T | I | T | N | N | R | L | F | D | C | V | H | P | S | C | S | T | - | R | F | H | P | N | I | Q | G | A | K | S | S |
| 101 | ICMV (S)       | -- | H | E | N | G | E | P | H | L | H | V | L | I | Q | F | E | G | K | Y | K | C | Q | N | Q | R | F | F | D | L | V | S | P | T | R | S | A | - | H | F | H | P | N | I | Q | G | A | K | S | S |
| 102 | SSEV (S)       | -- | H | A | D | G | S | W | H | I | H | A | L | A | Q | S | V | K | P | V | Q | T | T | N | P | R | F | F | D | - | - | I | E | D | - | - | - | - | F | H | P | N | I | Q | S | A | K | S | A |   |
| 103 | CabLCV (D)     | -- | H | S | D | G | F | P | H | L | H | C | L | I | Q | L | S | G | K | S | N | I | K | D | A | R | F | F | D | I | T | H | P | R | R | S | A | - | N | F | H | P | N | I | Q | A | A | K | D | T |
| 104 | ToYLDV (S)     | -- | H | E | N | G | E | P | H | L | H | V | L | I | Q | F | E | G | K | Y | Q | C | K | N | N | R | F | F | D | L | V | S | P | T | R | S | A | - | H | F | H | P | N | I | Q | G | A | K | S | S |
| 105 | ToLCLV (S)     | -- | H | E | D | G | S | P | H | L | H | V | L | I | Q | F | E | G | K | Y | N | C | T | N | N | R | F | F | D | L | V | S | P | T | R | S | A | - | H | F | H | P | N | I | Q | G | A | K | S | S |
| 106 | USV (S)        | -- | H | Q | D | G | T | W | H | C | H | A | L | A | Q | S | V | K | P | V | T | T | R | N | S | R | F | F | D | - | - | I | E | D | - | - | - | - | H | H | P | N | I | Q | S | A | K | S | V |   |
| 107 | ODV (N)        | -- | H | E | D | N | S | P | H | L | H | V | L | V | Q | C | E | K | R | A | S | I | T | N | P | N | A | L | N | L | R | M | D | L | S | P | F | T | T | Y | H | P | N | I | Q | P | A | N | N | C |
| 108 | TbMoLCV (S)    | -- | H | E | N | G | E | P | H | L | H | V | L | V | Q | F | E | G | K | Y | V | C | T | N | Y | R | F | F | D | L | V | S | P | S | R | S | A | - | H | F | H | P | N | V | Q | G | A | K | S | S |
| 109 | MaYMV (S)      | -- | H | Q | N | G | N | P | H | L | H | V | L | I | Q | F | E | G | K | Y | Q | C | K | N | N | R | F | F | D | L | V | S | P | T | R | S | A | - | L | F | H | P | N | I | Q | G | V | K | S | S |
| 110 | SPLCSPV (RXXS) | -- | H | E | D | G | Q | P | H | L | H | V | L | L | Q | F | E | G | N | Y | Q | C | T | N | Q | R | F | F | D | L | V | S | P | T | R | S | A | - | H | F | H | P | N | I | Q | R | A | K | S | S |
| 111 | PSLDV (S)      | -- | H | E | D | G | Q | P | H | L | H | V | L | I | Q | F | E | G | K | Y | N | C | Q | N | N | R | F | F | D | L | V | S | T | T | R | S | T | - | H | F | H | P | N | I | Q | G | A | K | S | S |
| 112 | SiYMoV (S)     | -- | H | E | N | G | E | P | H | L | H | V | L | V | Q | F | E | G | K | Y | Q | C | K | N | N | R | F | F | D | L | V | S | P | T | R | S | A | - | H | F | H | P | N | I | Q | G | A | K | S | S |
| 113 | CpCV (N)       | -- | H | Q | D | G | T | P | H | L | H | C | L | L | Q | L | D | K | R | G | D | I | R | D | P | S | F | F | D | - | - | F | E | G | - | - | - | - | N | H | P | N | I | Q | P | A | K | N | S |   |
| 114 | ToLCPalV (S)   | -- | H | E | D | G | S | P | H | I | H | V | L | I | Q | F | E | G | K | F | Q | C | K | N | N | R | F | F | D | L | V | A | P | S | R | S | A | - | H | F | H | P | N | I | Q | G | A | K | S | A |
| 115 | HeuYMV (S)     | -- | H | E | D | G | S | P | H | L | H | V | L | V | Q | F | E | G | K | Y | R | C | T | N | N | R | F | F | D | L | V | S | P | S | R | S | A | - | H | F | H | P | N | I | Q | G | A | K | S | S |
| 116 | PaLCrV (S)     | -- | H | E | N | G | E | P | H | L | H | V | L | I | Q | F | E | G | K | Y | K | C | K | N | N | R | F | F | D | L | V | S | P | T | R | S | A | - | H | F | H | P | N | I | Q | G | A | K | S | S |
| 117 | BCTV (RXXS)    | -- | H | E | D | G | Q | P | H | L | H | V | L | L | Q | L | E | G | K | V | Q | I | T | N | I | R | L | F | D | L | V | S | P | T | R | S | A | - | H | F | H | P | N | I | Q | R | A | K | S | S |
| 118 | CpCAV (N)      | -- | H | Q | D | G | T | P | H | L | H | C | L | L | Q | L | D | K | R | S | N | I | R | D | P | S | F | F | D | - | - | F | Q | G | - | - | - | - | N | H | P | N | I | Q | P | A | K | N | S |   |
| 119 | ToLCUV (S)     | -- | H | Q | N | G | E | P | H | L | H | A | L | I | Q | F | E | G | K | I | T | V | T | N | N | R | L | F | D | C | S | H | P | S | C | S | T | - | S | F | H | P | N | I | Q | G | A | K | S | S |
| 120 | ToICV (S)      | -- | H | E | D | G | Q | P | H | L | H | V | L | I | Q | F | E | G | K | Y | Q | C | T |   |   |   |   |   |   |   |   |   |   |   |   |   |   |   |   |   |   |   |   |   |   |   |   |   |   |   |



|     |               |    |   |   |   |   |   |   |   |   |   |   |   |   |   |   |   |   |   |   |   |   |     |   |   |   |   |   |   |   |   |   |   |   |   |   |   |   |   |   |   |   |   |   |   |   |   |   |   |   |
|-----|---------------|----|---|---|---|---|---|---|---|---|---|---|---|---|---|---|---|---|---|---|---|---|-----|---|---|---|---|---|---|---|---|---|---|---|---|---|---|---|---|---|---|---|---|---|---|---|---|---|---|---|
| 144 | PouGMV (S)    | -- | H | E | D | G | S | P | H | L | H | V | L | I | Q | F | E | G | K | F | Q | C | K   | N | Q | R | F | F | D | L | V | S | P | T | R | S | T | - | H | F | H | P | N | I | Q | G | A | K | S | S |
| 145 | EMSV (D)      | -- | H | K | D | G | F | P | H | L | H | A | L | V | Q | L | E | K | K | L | F | T | R   | R | Q | T | F | F | D | Q | F | L | H | G | T | - | - | - | K | F | H | P | N | I | Q | P | A | R | D | A |
| 146 | ToLCCNV (S)   | -- | H | E | D | G | S | P | H | L | H | V | L | I | Q | F | E | G | K | F | Q | C | K   | N | Q | R | F | F | D | L | T | S | P | S | R | S | A | - | H | F | H | P | N | I | Q | A | A | K | S | S |
| 147 | SiMBoV2 (S)   | -- | H | E | N | G | E | P | H | L | H | V | L | L | Q | F | E | G | K | F | K | C | Q   | N | Q | R | F | F | D | L | V | S | P | T | R | S | T | - | H | F | H | P | N | I | Q | G | A | K | S | S |
| 148 | BGYMV (S)     | -- | H | D | N | G | E | P | H | L | H | A | L | I | Q | F | E | G | K | F | I | C | T   | N | K | R | L | F | D | L | V | S | T | T | R | S | A | - | H | F | H | P | N | I | Q | G | A | K | S | S |
| 149 | SbMMoV (S)    | -- | H | E | N | G | E | P | H | L | H | V | L | I | Q | F | E | G | K | C | Q | I | T   | N | E | R | H | F | D | L | T | S | P | R | R | S | T | - | H | F | H | P | N | I | Q | G | A | K | S | S |
| 150 | LYMV (S)      | -- | H | Q | D | G | S | L | H | I | H | A | L | I | Q | F | K | G | K | C | Q | F | R   | N | P | R | H | F | D | V | T | H | P | N | T | S | T | - | Q | Y | H | P | N | F | Q | G | A | K | S | S |
| 151 | ToLCTV (S)    | -- | H | E | D | G | T | P | H | L | H | I | L | I | Q | F | E | G | K | F | Q | C | K   | N | N | R | F | F | D | L | T | S | P | T | R | S | A | - | H | F | H | P | N | I | Q | G | A | K | S | S |
| 152 | JMINV (S)     | -- | H | E | N | G | E | P | H | L | H | V | L | V | Q | Y | E | G | K | F | K | C | Q   | N | K | R | F | F | D | L | V | S | P | T | R | S | A | - | H | F | H | P | N | I | Q | G | A | K | S | S |
| 153 | PYMV (S)      | -- | H | E | N | G | E | P | H | L | H | V | L | I | Q | F | E | G | K | Y | N | C | T   | N | N | R | L | F | D | L | V | S | P | T | R | S | T | - | H | F | H | P | N | I | Q | G | A | K | S | S |
| 154 | TYDV (N)      | -- | H | Q | D | G | T | P | H | L | H | C | L | I | Q | L | D | K | R | S | N | I | R   | D | P | S | F | F | D | - | - | L | E | G | - | - | - | - | N | H | P | N | I | Q | P | A | K | N | S |   |
| 155 | MacYMV (S)    | -- | H | E | D | G | Q | P | H | L | H | V | L | I | Q | F | E | G | K | F | V | C | T   | N | N | R | L | F | D | L | V | S | P | S | R | S | A | - | H | F | H | P | N | V | Q | G | A | K | S | S |
| 156 | ToChLPV (S)   | -- | H | E | N | G | E | H | H | L | H | V | L | M | Q | F | E | G | K | I | Q | I | T   | N | Q | R | Q | F | D | L | V | S | P | T | R | S | A | - | H | F | H | P | N | I | Q | G | A | K | S | S |
| 157 | ToLCMYV (S)   | -- | H | E | D | G | S | P | H | L | H | V | L | I | Q | F | E | G | K | Y | Q | C | K   | N | N | R | F | F | D | L | V | S | P | T | R | S | A | - | H | F | H | P | N | I | Q | G | A | K | S | S |
| 158 | MacGMV (S)    | -- | H | E | D | G | Q | P | H | L | H | V | L | I | Q | F | Q | G | K | F | N | C | T   | N | N | R | L | F | D | L | V | S | P | S | R | S | T | - | H | F | H | P | N | I | Q | G | A | K | S | S |
| 159 | TYLCYnV (S)   | -- | H | E | D | G | S | P | H | L | H | V | L | I | Q | F | E | G | K | Y | K | C | Q   | N | N | R | F | F | D | L | V | S | P | T | R | S | A | - | H | F | H | P | N | I | Q | G | A | K | S | S |
| 160 | CoGMV (S)     | -- | H | Q | D | G | S | P | H | L | H | A | L | V | Q | F | Q | K | K | F | I | C | T   | N | C | R | L | F | D | L | S | H | P | Q | N | S | R | - | Q | F | H | C | H | I | E | T | A | R | S | S |
| 161 | OYCrV (S)     | -- | H | E | N | G | E | P | H | L | H | V | L | I | Q | F | E | G | K | Y | Q | C | T   | N | Q | R | F | F | D | L | V | S | P | T | R | S | A | - | H | F | H | P | N | I | Q | G | A | K | S | S |
| 162 | RhGMHaV (S)   | -- | H | E | N | G | E | P | H | L | H | V | L | I | Q | F | E | G | K | Y | Q | C | T   | N | N | R | F | F | D | L | V | S | T | T | R | S | A | - | H | F | H | P | N | I | Q | G | A | K | S | S |
| 163 | ToLCNDV3 (S)  | -- | H | Q | D | G | S | L | H | V | H | A | L | I | Q | F | K | G | K | S | K | F | R   | N | P | R | H | F | D | V | T | S | P | I | P | P | G | - | H | F | H | P | N | I | Q | G | A | K | S | A |
| 164 | SpYVV (S)     | -- | H | E | D | G | S | P | H | L | H | V | L | I | Q | F | E | G | K | Y | V | C | T   | N | K | R | F | F | D | L | V | S | P | T | R | S | T | - | H | F | H | P | N | I | Q | G | A | K | S | S |
| 165 | RhMMV (S)     | -- | H | E | N | G | E | P | H | L | H | V | L | I | Q | F | E | G | K | Y | Q | C | T   | N | N | R | F | F | D | L | V | S | P | T | R | S | A | - | H | F | H | P | N | I | Q | G | A | K | S | S |
| 166 | EuLCuV (S)    | -- | H | N | N | G | N | P | H | L | H | V | L | M | Q | F | E | G | K | Y | N | C | T   | N | N | R | F | F | D | L | V | S | P | N | R | S | T | - | H | F | H | P | N | I | Q | G | A | K | S | S |
| 167 | MCLMV (D)     | -- | H | S | D | G | S | P | H | L | H | C | L | I | Q | L | S | G | K | S | N | I | K   | N | A | R | F | F | D | L | T | H | P | R | R | S | A | - | C | F | H | P | N | I | Q | A | A | K | D | S |
| 168 | ToLCSiV (S)   | -- | H | E | N | G | E | P | H | L | H | V | L | I | Q | F | E | G | K | Y | Q | C | T   | N | N | R | F | F | D | L | V | S | P | T | R | S | A | - | H | F | H | P | N | I | Q | G | A | K | S | S |
| 169 | ChiLCV (S)    | -- | H | E | N | G | E | P | H | L | H | V | L | I | Q | F | E | G | K | F | K | C | Q   | N | N | R | F | F | D | L | V | S | P | T | R | P | A | - | H | F | H | P | N | I | Q | G | A | K | S | S |
| 170 | ToLCPatV (S)  | -- | H | E | N | G | E | P | H | L | H | V | L | I | Q | F | E | G | K | Y | Q | C | T   | N | N | R | F | F | D | L | V | S | P | T | R | S | A | - | H | F | H | P | N | I | Q | G | A | K | S | S |
| 171 | TbLCTHV (S)   | -- | H | E | D | G | S | P | H | L | H | V | L | I | Q | F | E | G | K | F | K | C | Q   | N | N | R | F | F | D | L | T | S | P | S | R | S | A | - | H | F | H | P | N | I | Q | G | A | K | S | S |
| 172 | SMLCuV (D)    | -- | H | S | D | G | F | P | H | L | H | C | L | I | Q | L | S | G | K | T | N | I | K   | N | A | R | F | F | D | L | T | H | P | R | R | A | A | - | C | F | H | P | N | I | Q | A | A | K | D | T |
| 173 | ToLDV (S)     | -- | H | E | N | G | E | P | H | L | H | V | L | I | Q | F | E | G | K | Y | Q | C | T   | N | N | R | F | F | D | L | V | S | P | S | R | S | A | - | H | F | H | P | N | I | Q | G | A | K | S | S |
| 174 | ToCmMV (D)    | -- | H | S | D | G | F | P | H | L | H | C | L | V | Q | L | S | G | K | S | N | I | K   | D | V | R | F | F | D | L | T | H | P | R | R | S | T | - | G | F | H | P | N | V | Q | A | A | K | D | T |
| 175 | ToCSV (S)     | -- | H | E | N | G | E | P | H | L | H | V | L | I | Q | F | E | R | K | F | N | C | K   | N | H | R | F | F | D | L | V | S | P | N | R | S | A | - | H | F | H | P | N | I | Q | G | A | K | S | S |
| 176 | EuYMV (D)     | -- | H | A | D | G | F | P | H | L | H | C | L | I | Q | L | S | G | K | S | N | I | K   | D | A | R | F | F | N | L | T | H | P | R | R | S | A | - | E | F | H | P | N | A | Q | S | A | K | D | A |
| 177 | PuYMV (S)     | -- | H | E | D | G | S | P | H | L | H | V | L | I | Q | F | E | G | K | C | N | C | T   | N | N | R | F | F | D | L | V | S | P | T | K | S | T | - | H | F | H | P | N | I | Q | G | A | K | S | S |
| 178 | SiYMCNV (S)   | -- | H | E | D | G | S | P | H | L | H | V | L | I | Q | F | E | G | K | Y | K | C | Q   | N | N | R | F | F | D | L | V | S | P | T | R | S | V | - | H | F | H | P | N | I | Q | G | A | K | S | S |
| 179 | PepYLCCNV (S) | -- | H | K | N | G | S | L | H | L | H | V | L | I | Q | F | K | G | K | A | Q | F | R   | N | P | R | H | F | D | I | T | H | P | N | T | S | T | - | Q | Y | H | P | N | F | Q | G | A | K | S | S |
| 180 | SPLCSiV1 (S)  | -- | H | Q | D | G | S | L | H | L | H | A | L | I | Q | F | K | G | K | A | Q | F | T   | N | P | R | H | F | D | L | T | H | P | N | S | S | T | - | Q | Y | H | P | N | F | Q | S | A | K | S | S |
| 181 | SPLCGV (S)    | -- | H | Q | D | G | S | L | H | L | H | A | L | I | Q | F | K | G | K | A | Q | F | K   | N | P | R | H | F | D | L | Q | H | P | N | S | S | N | - | Q | F | H | P | N | F | Q | G | A | K | S | S |
| 182 | ToLCLKV (S)   | -- | H | D | N | G | E | P | H | L | H | V | L | I | Q | F | E | G | K | F | K | C | Q   | N | N | R | F | F | D | L | V | S | P | T | R | S | A | - | H | F | H | P | N | I | Q | G | A | K | S | S |
| 183 | MerMV (S)     | -- | H | E | N | G | E | P | H | L | H | V | L | I | Q | F | E | G | K | Y | N | C | T   | N | N | R | F | F | D | L | V | S | P | T | R | S | T | - | H | F | H | P | N | I | Q | G | A | K | S | S |
| 184 | EACMKV (S)    | -- | H | G | N | G | E | P | H | L | H | A | L | I | Q | F | E | G | K | Y | N | C | T   | N | P | R | F | F | D | L | I | S | P | S | R | S | A | - | H | F | H | P | N | I | Q | G | A | K | S | S |
| 185 | MacMPRV (S)   | -- | H | E | D | G | Q | P | H | L | H | V | L | I | Q | F | E | G | K | F | V | C | T   | N | Q | R | L | F | D | L | V | S | P | T | R | S | T | - | H | F | H | P | N | I | Q | G | V | K | S | S |
| 186 | MaYVYnV (S)   | -- | H | K | N | G | N | P | H | L | H | V | L | I | Q | F | E | G | K | F | Q | C | R   | N | N | R | F | F | D | L | T | S | P | S | R | S | A | - | H | F | H | P | N | I | Q | G | A | K | S | S |
| 187 | ToYSV (S)     | -- | H | E | D | G | E | P | H | L | H | V | L | I | Q | F | E | G | K | F | V | C | T   | N | Q | R | L | F | D | L | V | S | Q | T | R | S | A | - | H | F | H | P | N | I | Q | G | A | K | S | S |
| 188 | MacYSV (S)    | -- | H | G | N | G | E | P | H | L | H | A | L | Q | F | E | G | K | F | T | C | T | N   | C | R | F | F | D | L | R | H | P | S | H | S | N | - | V | C | H | G | K | Y | E | S | C | K | S | S |   |
| 189 | BYVMV (S)     | -- | H | E | N | G | E | P | H | L | H | V | L | I | Q | F | E | G | K | Y | K | C | Q</ |   |   |   |   |   |   |   |   |   |   |   |   |   |   |   |   |   |   |   |   |   |   |   |   |   |   |   |



|     |                |    |      |     |    |     |    |   |   |   |   |   |   |   |   |   |   |   |   |   |   |   |   |   |   |   |   |   |   |   |   |   |   |   |   |   |   |   |   |   |   |   |   |   |   |   |   |
|-----|----------------|----|------|-----|----|-----|----|---|---|---|---|---|---|---|---|---|---|---|---|---|---|---|---|---|---|---|---|---|---|---|---|---|---|---|---|---|---|---|---|---|---|---|---|---|---|---|---|
| 214 | SgYVGxV (S)    | -- | HEDG | TPH | LH | VLI | QF | E | G | K | F | C | Q | N | R | F | F | D | L | V | S | P | T | R | S | A | - | H | F | H | P | N | I | Q | G | A | K | S | S |   |   |   |   |   |   |   |   |
| 215 | ToLCKeV (S)    | -- | HENG | EPH | LH | VLI | QF | E | G | K | Y | K | C | Q | N | R | F | F | D | L | V | S | P | T | R | S | A | - | H | F | H | P | N | I | Q | G | A | K | S | S |   |   |   |   |   |   |   |
| 216 | SiYMV (S)      | -- | HEDG | SPH | LH | VLI | QF | E | G | K | Y | N | C | K | N | N | R | F | F | D | L | V | S | P | S | R | S | T | - | H | F | H | P | N | I | Q | G | A | K | S | S |   |   |   |   |   |   |
| 217 | SPMV (S)       | -- | HEDG | QPH | I  | H   | V  | L | L | Q | F | E | G | K | F | V | C | T | N | Q | R | L | F | D | L | V | S | P | T | R | S | A | - | H | F | H | P | N | I | Q | G | A | K | S | S |   |   |
| 218 | ToLCCeV (S)    | -- | HEDG | SPH | LH | VLI | QF | E | G | K | Y | R | C | T | N | Q | R | F | F | D | L | V | S | P | T | R | S | A | - | H | F | H | P | N | I | Q | G | A | K | S | S |   |   |   |   |   |   |
| 219 | TGVV (S)       | -- | HEDG | EPH | LH | VLI | QF | E | G | K | F | K | C | Q | N | Q | R | F | F | D | L | V | S | P | T | R | S | A | - | H | F | H | P | N | I | Q | G | A | K | S | S |   |   |   |   |   |   |
| 220 | SSMV1 (S)      | -- | HQDS | G   | F  | H   | V  | H | C | L | V | Q | L | T | D | Q | Y | R | S | R | D | S | S | F | A | D | - | - | L | G | G | - | - | - | N | H | P | N | I | Q | T | V | R | S | A |   |   |
| 221 | MerMPRV (S)    | -- | HENG | EPH | LH | VLI | QF | E | G | K | Y | Q | C | K | N | N | R | F | F | D | L | V | S | P | T | R | S | A | - | H | F | H | P | N | I | Q | G | A | K | S | S |   |   |   |   |   |   |
| 222 | MiYLCV (S)     | -- | HEDG | SPH | LH | VLI | QF | E | G | K | F | V | C | T | N | N | R | F | F | D | L | V | S | P | T | R | S | A | - | H | F | H | P | N | I | Q | G | A | K | S | S |   |   |   |   |   |   |
| 223 | RhRGMV (S)     | -- | HENG | EPH | LH | VLI | QF | E | G | K | Y | Q | C | T | N | Y | R | F | F | D | L | V | S | P | T | R | S | A | - | H | F | H | P | N | I | Q | G | A | K | S | S |   |   |   |   |   |   |
| 224 | HgYMV (S)      | -- | HENG | EPH | LH | VLI | QF | E | G | K | F | H | T | R | N | Q | R | F | F | D | L | V | S | S | T | R | S | T | - | H | F | H | P | N | I | Q | T | A | Q | S | C |   |   |   |   |   |   |
| 225 | ToLCYTV (S)    | -- | HQNG | EPH | I  | H   | M  | F | I | Q | F | E | G | K | I | R | I | T | N | C | R | L | F | D | L | V | S | P | T | R | S | V | - | H | F | H | P | N | I | Q | G | A | K | S | S |   |   |
| 226 | PaLCuCNV (S)   | -- | HEDG | TPH | LH | VLI | QF | E | G | K | F | Q | C | K | N | Q | R | F | F | D | L | V | S | P | N | R | S | A | - | H | F | H | P | N | I | Q | G | A | K | S | S |   |   |   |   |   |   |
| 227 | ToLCJV (S)     | -- | HENG | EPH | LH | VLI | QF | E | G | K | F | Q | C | K | N | H | R | F | F | D | L | V | S | P | S | R | S | A | - | H | F | H | P | N | I | Q | G | A | K | S | S |   |   |   |   |   |   |
| 228 | AbGMV (D)      | -- | HSDG | F   | P  | H   | L  | H | C | L | L | Q | L | S | G | K | S | N | I | K | D | A | R | F | F | D | L | T | H | P | R | R | S | A | - | T | F | H | P | N | I | Q | A | A | K | D | T |
| 229 | RaLCuV (S)     | -- | HENG | EPH | L  | R   | V  | L | I | Q | F | E | G | K | Y | K | C | K | N | N | R | F | F | D | L | V | S | P | T | R | S | A | - | H | F | H | P | N | I | Q | G | A | K | S | S |   |   |
| 230 | EuMV (D)       | -- | HRDG | F   | P  | H   | L  | H | C | L | I | Q | L | S | G | K | S | N | I | K | D | A | R | F | F | D | I | S | H | P | R | R | S | T | - | C | F | H | P | N | I | Q | G | A | K | D | T |
| 231 | PSMV (M)       | -- | HKDG | S   | H  | H   | L  | H | C | I | I | Q | C | S | K | Y | V | R | T | T | S | A | K | F | F | D | - | - | I | K | E | - | - | - | - | F | H | P | N | V | Q | N | P | R | M | P |   |
| 232 | WGMV (S)       | -- | HENG | EPH | LH | VLI | QF | E | G | K | Y | Q | C | T | N | Y | R | F | F | D | L | V | S | S | T | R | S | A | - | H | F | H | P | N | I | Q | G | A | K | S | S |   |   |   |   |   |   |
| 233 | DDSMV (N)      | -- | HQDG | EPH | LH | A   | F  | L | Q | F | D | K | V | F | R | T | T | S | A | K | Y | F | D | - | - | F | F | E | - | - | - | - | F | H | P | N | I | Q | A | A | R | N | P |   |   |   |   |
| 234 | AbMBV (D)      | -- | HSDG | H   | P  | H   | L  | H | C | L | I | Q | L | S | G | K | S | N | I | R | D | A | R | F | F | D | L | T | H | P | R | R | S | A | - | S | F | H | P | N | V | Q | A | A | K | D | T |
| 235 | VeYVV (S)      | -- | HEDG | TPH | LH | VLI | QF | E | G | K | F | K | C | Q | N | N | R | F | F | D | L | Q | T | P | S | R | S | A | - | H | F | H | P | N | I | Q | G | A | K | S | S |   |   |   |   |   |   |
| 236 | ToYMLCV (S)    | -- | HEDG | EPH | LH | VLI | QF | E | G | K | Y | Q | C | K | N | N | R | F | F | D | L | V | S | P | T | R | S | T | - | H | F | H | P | N | I | Q | G | A | K | S | S |   |   |   |   |   |   |
| 237 | WAAV1 (S)      | -- | HENG | EPH | LH | M   | L  | V | Q | F | E | G | K | F | K | C | Q | N | K | R | F | F | D | L | V | S | P | T | R | S | A | - | H | F | H | P | N | I | Q | G | A | K | S | S |   |   |   |
| 238 | MiSV (D)       | -- | HKDG | D   | P  | H   | L  | H | V | L | I | Q | L | N | T | K | L | C | T | R | N | P | K | F | F | D | - | - | V | Q | G | - | - | - | - | F | H | P | N | I | Q | P | V | R | D | A |   |
| 239 | SiGMCRV (S)    | -- | HEDG | QPH | LH | VLI | QF | E | G | K | Y | Q | C | T | N | Q | R | F | F | D | L | V | S | P | T | R | S | V | - | H | F | H | P | N | I | Q | G | A | K | S | S |   |   |   |   |   |   |
| 240 | ToCMoV (S)     | -- | HENG | EPH | LH | VLI | QF | E | G | K | Y | N | C | K | N | N | K | F | F | D | L | V | S | P | T | R | S | A | - | H | F | H | P | N | I | Q | G | A | K | S | S |   |   |   |   |   |   |
| 241 | CLCuBaV (S)    | -- | HENG | EPH | I  | H   | V  | L | I | Q | F | E | G | K | Y | K | C | Q | N | Q | R | F | F | D | L | V | S | P | T | R | S | A | - | H | F | H | P | N | I | Q | G | A | K | S | S |   |   |
| 242 | ToLCPuV (RXXS) | -- | HENG | EPH | I  | H   | V  | L | I | Q | F | E | G | K | F | Q | C | T | N | N | R | F | F | D | L | V | S | P | T | R | S | A | - | H | F | H | P | N | I | Q | R | A | K | S | S |   |   |
| 243 | MaYMJV (S)     | -- | HQNG | K   | P  | H   | L  | H | V | L | I | Q | F | E | G | K | Y | A | C | T | N | N | R | F | F | D | L | V | P | T | T | R | S | T | - | H | F | H | P | N | I | Q | G | A | R | S | S |
| 244 | MYMV (S)       | -- | HEDG | EPH | LH | VLI | QF | E | G | K | L | Q | T | K | N | E | R | F | F | D | L | V | S | P | T | R | S | T | - | H | Y | H | P | N | V | Q | A | A | K | S | A |   |   |   |   |   |   |
| 245 | ToLCRaV (S)    | -- | HEDG | SPH | I  | H   | V  | L | I | Q | F | E | G | K | Y | Q | C | K | N | N | R | F | F | D | L | V | S | P | S | R | S | A | - | H | F | H | P | N | I | Q | G | A | K | S | A |   |   |
| 246 | CpYV (N)       | -- | LP   | -   | -  | A   | H  | L | H | C | L | L | Q | L | D | K | R | S | N | I | R | D | P | S | F | F | D | - | - | F | E | G | - | - | - | - | N | H | P | N | I | Q | P | A | K | N | S |
| 247 | SoMBoV (S)     | -- | HENG | EPH | LH | VLI | QF | E | G | K | Y | I | C | T | N | Q | R | F | F | D | L | V | S | P | T | R | S | A | - | H | F | H | P | N | I | Q | G | A | K | S | S |   |   |   |   |   |   |
| 248 | ToMoWV (S)     | -- | HENG | EPH | LH | VLI | QF | E | G | K | Y | Q | C | T | N | N | R | F | F | D | L | V | S | P | T | R | S | A | - | H | F | H | P | N | I | Q | G | A | K | S | S |   |   |   |   |   |   |
| 249 | EACMV (S)      | -- | HQDG | V   | P  | H   | L  | H | V | L | I | Q | F | E | G | K | F | Q | C | T | N | P | R | F | F | D | L | I | S | P | S | R | S | T | - | H | F | H | P | N | I | Q | G | A | K | S | S |
| 250 | TbLRV (S)      | -- | HENG | EPH | LH | VLI | QF | E | G | K | Y | Q | C | K | N | N | R | F | F | D | L | V | S | P | T | R | S | A | - | H | F | H | P | N | I | Q | G | A | K | S | S |   |   |   |   |   |   |
| 251 | SiCMV (S)      | -- | HEDG | QPH | LH | VLI | V  | Q | F | E | G | K | F | N | C | T | N | S | R | L | F | D | L | V | S | P | S | R | S | T | - | H | F | H | P | N | I | Q | G | A | K | S | S |   |   |   |   |
| 252 | HemYMV (RXXS)  | -- | HENG | EPH | LH | VLI | QF | E | G | K | Y | N | C | T | S | D | R | F | F | D | L | S | H | P | S | C | S | A | - | S | F | H | P | N | I | Q | R | A | K | S | S |   |   |   |   |   |   |
| 253 | SPLCSCV (RXXS) | -- | HENG | EPH | LH | VLI | QF | E | G | N | Y | Q | C | T | N | Q | R | F | F | D | L | V | S | P | S | R | S | A | - | H | F | H | P | N | I | Q | R | A | K | S | S |   |   |   |   |   |   |
| 254 | TbYCV (S)      | -- | HENG | EPH | LH | VLI | QF | E | G | K | Y | T | C | T | N | N | R | F | F | D | L | V | S | P | T | R | S | A | - | H | F | H | P | N | I | Q | G | A | K | S | S |   |   |   |   |   |   |
| 255 | PepGMV (D)     | -- | HSDG | F   | P  | H   | L  | H | C | L | I | Q | L | T | G | K | C | N | I | K | D | A | R | F | F | D | I | T | H | P | R | R | S | A | - | Q | F | H | P | N | V | Q | A | A | K | D | A |
| 256 | CLCuKoV (S)    | -- | HEDG | TPH | LH | VLI | QF | E | G | K | F | K | C | Q | N | M | R | F | F | D | L | V | S | P | S | R | S | A | - | H | F | H | P | N | I | Q | G | A | K | S | S |   |   |   |   |   |   |
| 257 | SauLCuV (S)    | -- | HEDG | SPH | LH | VLI | QF | E | G | K | Y | N | C | S | N | N | R | F | F | D | L | V | S | P | T | R | A | A | - | H | F | H | P | N | I | Q | G | A | K | S | S |   |   |   |   |   |   |
| 258 | ToLCGV (S)     | -- | HENG | EPH | LH | A   | L  | I | Q | F | E | G | K | Y | K | C | Q | N | N | R | F | F | D | L | V | S | P | T | R | S | A | - | H | F | H | P | N | I | Q | G | A | K | S | S |   |   |   |
| 259 | ToMMV (S)      | -- | HDDG | EPH | LH | VLI | QF | E | G | K | F | Q | C | T | N | N | R | F | F | D | L | V | S | P | T | R | S | A | - | H | F | H | P | N | V | Q | G | A | K | S | S |   |   |   |   |   |   |
| 260 | MaLCuV (S)     | -- | HNNG | N   | P  | H   | L  | H | V | L | M | Q | F | E | G | K | Y | N | C | T | N | N | R | F | F | D | L | V | S | P | T | R | S | T | - | H | F | H | P | N | I | Q | G | A | K | S | S |
| 261 | JYMINV (S)     | -- | HENG | EPH | LH | VLI | QF | E | G | K | Y | K | C | Q | H | Q | R | F | F | D | L | V | S | P | T | R | S | A | - | Q | F | H | P | N | I | Q | G | A | K | S | S |   |   |   |   |   |   |
| 262 | SLCuV (E)      | -- | HSDG | A   | P  | A   | L  | T | R | L | K | Q | L | S | G | K | S | N | N | K | E | L | G | I | F | P | T | N | T | Q | R | R | S | A | - | R | F | H | P | K | I | R | A | P | K | E | T |
| 263 | OELCuV (S)     | -- | HENG | EPH | LH | VLI | QF | E | G | K | Y | K | C | Q | N | Q | R | F | F | D | L | V | S | P | S | R | S | A | - | H | F | H | P | N | I | Q | G | A | K | S | S |   |   |   |   |   |   |
| 264 | MaLCPHV (S)    | -- | HQNG | N   | P  | H   | L  | H | V | L | I | Q | F | E | G | K | F | Q | C | K | N | N | R | F | F | D | L | V | S | Q | T | R | S | A | - | H | F | H | P | N | I | Q | G | A | K | S | S |
| 265 | H              |    |      |     |    |     |    |   |   |   |   |   |   |   |   |   |   |   |   |   |   |   |   |   |   |   |   |   |   |   |   |   |   |   |   |   |   |   |   |   |   |   |   |   |   |   |   |



284 DiYMoV (S) -- HEDGQPHLHVLIQFEGKYNCTSNRFFDLVSPTRSA-HFHPNIQQGAKSS

285 CLCuGeV (S) -- HEDGQPHLHVLIQFEGKFKCQNRQLFDLVSPNRSST-HFHPNIQQGAKSS

286 BoYSV (S) -- HENGEPHLHVLIQLEGKVQITNQRFDLVSPTRSA-HFHPNIQQGAKSS

287 MerLCV (S) -- HQDGSLLHALIQFKGKAQFKNPRHFDLQHPNSST-QFHPNFQQGAKSS

288 SiLCuV (S) -- HENGEPHIVLIQFEGKYKCQNQRFFDLVSPNRSST-HFHPNIQQGAKSS

289 ALYVV (S) -- HEDGNPHLHALVQFEGKFCITNPRFFDLQSPNSST-QYHCFITDAKSS

290 MYMIV (S) -- HEDGHPHLHVLIQFEGKHQTRNQRFDFDLHSRCRSA-YYHPNIQAAKSC

291 ToBYMoV (D) -- HQMGILTSPVSYNIR-KVNIKDARFFDLTHPRRSA-NFHPNIQAAKDA

292 CpRLV (N) -- HQDGSPLHCLIQLTNKPNISDASFDD--FEG---NHPNIQPARNSS

293 ToLCSCV (S) -- HQDGSLLHALIQFKGKAQFKNPRHFDLQHPNTSSS-QFHPNFQQGAKSS

294 BDMV (S) -- HEDGEPHLHVLIQFEGKYQCTNNRFFDLVSPTRSA-HFHPNIQQGAKSS

295 RhYMV (S) -- HEDGTPHLHVLIQFEGKFQTRNQRFDFDLVSPTRSA-HYHPNVQAAKSA

296 SiYLCV (D) -- HSDGFPHLHCLVQLSGKSNIKDVRFFDLTHPRRSA-GFHPNIQAAKDT

297 ToGMoV (S) -- HENGKPHLHALVQLEGKVQITNERQFDLVSPTRSA-HFHPNIQQGAKSS

298 PepYLCIV (S) -- HEDGSPHLHVLIQFEGKYVCTNNRFFDILLSSTRAA-HFHPNIQQGAKSS

299 BChMV (S) -- HEDGQPHLHVLIQFEGKYQCTNNRFFDLVSPTRSA-HFHPNIQQGAKSS

300 SiMoAV (S) -- HDDGEPHLHVLIQFEGKFQCTNNRFFDMVSPTRSA-HFHPNIQQGAKSS

301 ToYVSV (S) -- HEDGEPHLHVLIQFEGKFKCHNQRFDFDLVSPTRSA-HFHPNIQQGAKSS

302 TbCSV (S) -- HEDGTPHLHVLIQFEGKFQCKNQRFDFDLTSPTRSA-HFHPNIQQGAKSS

303 CeYSV (S) -- HEDGQPHLHVLIQLEGKAQITNQRLFDLVSPTRSA-HFHPNIQQGAKSS

304 CoYVV (S) -- HQDGSPLHALVQFQKKYRCTNCRFLFDLSNPNSSQ-QYHCNIQTARSS

305 ToSLCV (D) -- HADGFPHLHCLIQLSGKSNIKDARFFDLTHPRRSA-NFHPNAQAAKDT

306 CLCuAlV (S) -- HQDGSLLHIALIQFKGKAKFRNPRHFDVTHPHTST-QFHPNFQQGAKSS

307 SSV (S) -- HEDGGYHIVLAQSAKPVYTTDSGFFD--IDG---FHPNIQSAKSA

308 SSRV (S) -- HADGEWHLHALVQSVRPVQTNTQGFDD--IES---FHPNIQSAKSA

309 SbBMV (S) -- HEDGEPHLHVLIQFEGKYQCTNNRFFDLVSPTRSA-HFHPNIQQGAKSS

310 SiYBV (S) -- HEDGQPHLHVLIQFEGKFQCKNNRFFDLVSPTRSA-HFHPNVQGAKSS

311 PepYVMLV (S) -- HTNGEPHLHVLMQFEGKYQCTNNRFFDLVSPTRST-HFHPNIQQGAKSS

312 CaYMV (S) -- HQDGSLLHIALIQFKGKSQFRNPRHFDVTHPNTST-QFHPNFQQGAKSS

313 ESV (S) -- HQDGSWHLHALAQSVKPVYTHDERFFD--IED---YHPNIQAAKSA

314 EuLGxCV (S) -- HEDGSPHLHVLIQFEGKFKCQNNRFFDLTSPSRSA-HFHPNIQQGAKSS

315 SLCCNV (S) -- HEDGSPHIVLIQFEGKFQCKNIRFFDLVSPSRSA-HFHPNIQQGAKSA

316 ToLCMLV (S) -- HEDGEHHLHVLIQFEGKYNCTNQRFDFDLVSPTRSA-HFHPNVQGAKSS

317 BGMV (S) -- HENGEPHLHALIQFEGKFQCTNCRVFDLKHPTTSS-VSHANIQSAKSS

318 SpSCTV (D) -- HADGTPHLHCLIQLSGKSNIKDCRFFDITHPRRSA-NYHPNVQAAKDA

319 BLYSV (S) -- HENGEPHLHALLQFEGKFTCTNCRFFDIRHPRNSN-VCHGKYESCRSS

320 ChiLCKV (S) -- HQDGSLLHIALIQFKGKSKFRNPRHFDVTHPNNAT-QFHPNFQQGAKSS

321 SLCMV (S) -- HQNGEPHLHALLQFEGKLTITNNRQFDCVHPSST-SFHPNIQSAKSS

322 MeYVMV (S) -- HEDGTPHLHVLIQFEGKFKCQNMRFDFDLVSPNRSST-HFHPNIQQGAKSS

323 SiMMV (S) -- HENGEPHLHVLIQFQGKFQCTNNRFLFDLVSPTRSA-HFHPNIQQGAKSS

324 RhGMV (S) -- HEDGQPHLHVLIQFEGKFQCTNNRFFDLVSPTRSA-HFHPNIQQGAKSS

325 SiGMBRV (S) -- HENGKPHLHALVQFEGKFQCTNCRFFDLKHPNTSS-VAHANIQGAKSS

326 SiGMoV (S) -- HENGEPHIVLIQFEGKYNCTNNRFFDLVSPTSV-HFHPNIQQGAKSS

327 CarYSYV (D) -- HSDGFPHLHCLLQLSGKSNIKDAGFFDLTHPRRSA-RFHPNIQAAKDT

328 BYVBhV (T) -- HEDGTPHLHVLIQFEGKYKCQNNRFFDLTSPNRSST-HFHPNIQQGAKTS

329 TYLCIDV (S) -- HEDGEPHLHVLIQFEGKFKTKNKRFFDLVSPTRST-HFHPNIQQGAKSS

330 ToLCBaV (KXXS) -- HVDGEPHLHVLIQFEGKFQCTNNRFFDLVSPTRST-HFHPNIQKAKSS

331 TYLCKaV (S) -- HEDGSPHLHVLIQFEGKFQCKNNRFFDLVSPTRSA-HFHPNVQGAKSS

332 ChiLCVV (S) -- HQDGSLLHIALIQFKGKAQFRNPRHFDVTHPNTSS-QFHPNFQQGAKSS

333 DoYMV (S) -- HQDGTMLHALVQFKGKAQFRNARHFDLTHPHSTQ-VFHGNVQGAKSS

334 CdTV (S) -- HENGEPHLHVLIQFEGKYQCTNNRFFDLVSPTRSA-HFHPNIQQGAKSS

335 ToLCMiV (S) -- HEDGSPHLHVLVQFEGKYRCTNSRFFDLVSPSRSA-HFHPNIQQGAKSS

336 ToLCJaV (S) -- HEDGSPHLHVLIQFEGKFKCQNNRFFDLTSPTRSA-HFHPNIQQGAKSS

337 OMoV (S) -- HENGEPHLHVLIQLEGKVQITNNRFLFDLVSPTRSA-HFHPNIQQGAKSS

001 AllLCV (S) SDVKSYIDKDG-DTIEW---GQFQ--VDGR

002 TbLCZV (S) SDVKSYIDKDG-DTLEW---GEFQ--VDGR

003 TbLCPuV (S) SDVKSYMDKDG-DTLEW---GEFQ--IDGR

004 CraYVV (S) TDVKSYMEKDG-DVLDH---GIFQ--IDGR

005 SiYMAV (S) SDVKSYVEKDG-DTIEW---GVFQ--IDGR

006 EYVV (S) TDVKTYMEKDG-DVLDH---GSFQ--IDGR

007 ToLCBV (S) SDVKAYVEKDG-DFIDF---GVFQ--IDGR

008 SiGMBuV (S) SDVKSYVEKDG-DTIEW---GQFQ--IDGR

009 LuYVV (S) SDVKSYIEKDG-DYVDW---GVFQ--VDGR

010 WDIV (N) TLCRDYILKGPITFSEK---GAFIPRGRNA

011 CSMV (Q) ASTLK YCMKHPESSWEF---GKFLKP-KVN

012 PouMGDV (S) SDVKSYIDKDG-DTIEW---GQFQ--VDGR

013 PaLCuGdV (S) SDVKSYLDKDG-DTLDW---GEFQ--IDGR



|     |              |   |   |   |   |   |   |   |   |   |   |   |   |   |   |   |   |   |   |   |   |   |   |   |   |   |   |   |   |   |   |
|-----|--------------|---|---|---|---|---|---|---|---|---|---|---|---|---|---|---|---|---|---|---|---|---|---|---|---|---|---|---|---|---|---|
| 014 | SiGYV (S)    | S | D | V | K | S | Y | I | A | K | D | G | - | D | T | L | E | W | - | - | - | G | E | F | Q | - | - | I | D | G | R |
| 015 | CLCrV (D)    | N | A | V | K | N | Y | I | T | K | D | G | - | D | C | C | E | S | - | - | - | G | Q | F | K | - | - | - | - | - | - |
| 016 | ToLCSuV (S)  | S | D | I | K | S | Y | I | Q | K | D | G | - | D | Y | L | D | W | - | - | - | G | C | S | Q | - | - | I | D | G | R |
| 017 | CPGMV (S)    | S | D | V | K | S | Y | I | E | K | D | G | - | D | T | I | S | W | - | - | - | G | E | F | Q | - | - | I | D | G | R |
| 018 | AYVSLV (S)   | S | D | V | K | T | Y | M | E | K | D | G | - | D | I | L | D | H | - | - | - | G | V | F | Q | - | - | V | D | G | R |
| 019 | SiGMBcV (S)  | S | D | V | K | S | Y | I | A | K | D | G | - | D | T | I | E | W | - | - | - | G | V | F | Q | - | - | I | D | G | R |
| 020 | DaLDV (S)    | S | D | V | K | S | Y | I | D | K | D | G | - | D | T | I | E | W | - | - | - | G | K | F | Q | - | - | I | D | G | R |
| 021 | ToLCToV (S)  | S | D | V | K | S | Y | I | D | K | D | G | - | D | T | L | E | W | - | - | - | G | E | F | Q | - | - | I | D | G | R |
| 022 | ToLCNDV4 (S) | S | D | V | K | S | Y | M | E | K | D | G | - | D | V | L | E | W | - | - | - | G | V | F | Q | - | - | V | D | G | R |
| 023 | TCTV (S)     | S | D | V | K | S | Y | I | E | K | D | G | - | D | Y | I | D | W | - | - | - | G | E | F | Q | - | - | I | D | A | R |
| 024 | TYLCMa1V (S) | S | D | V | K | S | Y | V | D | K | D | G | - | D | T | V | D | W | - | - | - | G | E | F | Q | - | - | I | D | G | R |
| 025 | TYLCAxV (S)  | T | D | V | K | T | Y | V | E | K | D | G | - | D | F | I | D | F | - | - | - | G | V | F | Q | - | - | I | D | G | R |
| 026 | SiYVVV (S)   | S | D | V | K | S | Y | I | D | K | D | G | - | D | T | L | E | W | - | - | - | G | E | F | Q | - | - | I | D | G | R |
| 027 | PepLCV (S)   | T | D | V | R | E | Y | I | A | K | N | G | - | D | V | L | D | H | - | - | - | G | V | F | Q | - | - | I | D | G | R |
| 028 | DaChMV (S)   | S | D | V | K | T | Y | V | E | K | D | G | - | D | F | I | D | F | - | - | - | G | E | F | Q | - | - | I | D | P | R |
| 029 | VBSMV (S)    | S | D | V | K | K | Y | M | E | K | D | G | - | D | V | L | D | H | - | - | - | G | E | F | Q | - | - | I | D | G | R |
| 030 | SSMV2 (S)    | T | N | V | R | D | Y | C | L | K | N | P | V | S | K | A | E | R | - | - | - | G | T | F | I | P | L | K | G | R | T |
| 031 | ToMoLCV (S)  | S | D | V | K | S | Y | V | E | K | D | G | - | D | F | I | D | H | - | - | - | G | V | F | Q | - | - | I | D | G | R |
| 032 | BCTIV (A)    | K | R | A | F | E | Y | I | T | K | E | D | T | S | P | R | T | F | - | - | - | G | E | L | R | - | - | L | G | G | R |
| 033 | PepLCLaV (S) | S | D | V | K | S | Y | I | E | K | D | S | - | D | Y | I | D | W | - | - | - | G | Q | F | Q | - | - | I | D | G | R |
| 034 | KuMV (S)     | S | D | V | K | K | Y | M | E | K | D | G | - | D | V | L | D | F | - | - | - | G | I | F | Q | - | - | V | D | G | R |
| 035 | CoYSV (S)    | S | D | V | K | S | Y | V | E | K | D | G | - | D | T | I | E | W | - | - | - | G | V | F | Q | - | - | I | D | G | R |
| 036 | ChiLCPKV (S) | S | D | V | K | S | Y | I | E | K | D | G | - | D | Y | I | D | W | - | - | - | G | R | F | Q | - | - | I | D | G | R |
| 037 | JLCuV (S)    | S | D | V | K | S | Y | I | E | K | D | G | - | D | F | I | D | W | - | - | - | G | F | F | Q | - | - | I | D | G | R |
| 038 | ErYMV (S)    | S | D | V | K | S | Y | M | E | K | D | G | - | D | V | L | D | H | - | - | - | G | I | F | Q | - | - | I | D | G | R |
| 039 | CLCuMuV (S)  | S | D | V | K | D | Y | I | D | K | D | G | - | D | T | L | E | W | - | - | - | G | E | F | Q | - | - | I | D | G | R |
| 040 | PaLCuV (S)   | S | D | V | K | S | Y | I | E | E | D | S | - | D | Y | I | D | W | - | - | - | G | Q | F | Q | - | - | I | D | G | R |
| 041 | ToMoTaV (S)  | S | D | V | K | T | Y | I | T | K | D | G | - | D | T | L | E | W | - | - | - | G | E | F | Q | - | - | I | D | G | R |
| 042 | ToCLLDV (S)  | S | D | V | K | S | Y | I | D | K | D | G | - | D | T | I | E | W | - | - | - | G | E | F | Q | - | - | I | D | G | R |
| 043 | SPLCV (S)    | S | D | V | K | S | Y | V | D | K | D | G | - | D | T | I | T | W | - | - | - | G | E | F | Q | - | - | V | D | G | R |
| 044 | CLYMV (S)    | S | D | V | K | R | Y | I | E | K | D | G | - | D | Y | V | E | W | - | - | - | G | R | F | Q | - | - | I | D | G | R |
| 045 | ToLCV (G)    | S | D | V | K | S | Y | L | E | K | D | G | - | D | T | L | E | W | - | - | - | G | E | F | Q | - | - | I | D | G | R |
| 046 | MaYMHcV (S)  | S | D | V | K | S | Y | V | A | K | D | G | - | D | T | I | E | W | - | - | - | G | V | F | E | - | - | I | D | G | R |
| 047 | ToYMoV (S)   | S | D | V | K | S | Y | M | E | K | D | G | - | E | F | L | D | F | - | - | - | G | V | F | Q | - | - | I | D | G | R |
| 048 | WmCSV (S)    | T | D | V | K | S | Y | L | D | K | D | G | - | D | T | V | E | W | - | - | - | G | K | F | Q | - | - | I | D | G | R |
| 049 | ToLCHaV (S)  | T | D | V | K | T | Y | M | E | K | D | G | - | D | V | L | D | H | - | - | - | G | V | F | Q | - | - | I | D | G | R |
| 050 | CuLCuV (D)   | N | A | V | K | N | Y | I | T | K | E | G | - | D | Y | C | E | S | - | - | - | G | K | Y | K | - | - | - | - | - | - |
| 051 | ClGMCNV (S)  | S | D | V | K | S | Y | I | D | K | D | G | - | D | T | L | E | W | - | - | - | G | Q | F | Q | - | - | I | D | G | R |
| 052 | OYMV (S)     | S | D | V | K | S | Y | I | D | K | D | G | - | D | T | I | E | W | - | - | - | G | E | F | Q | - | - | I | D | G | R |
| 053 | SLCuYV (S)   | S | D | V | K | S | Y | I | E | K | D | G | - | D | Y | I | D | W | - | - | - | G | Q | F | Q | - | - | I | D | G | R |
| 054 | CMMGV (S)    | S | D | V | K | S | Y | I | D | K | D | G | - | D | T | T | E | W | - | - | - | G | E | F | Q | - | - | I | D | A | R |
| 055 | ToLCSDV (S)  | S | D | V | K | S | Y | I | D | K | D | G | - | D | T | I | D | W | - | - | - | G | E | F | Q | - | - | I | D | G | R |
| 056 | PepLCBV (S)  | S | D | V | K | S | Y | I | E | K | D | G | - | D | Y | I | D | W | - | - | - | G | R | F | Q | - | - | I | D | G | R |
| 057 | ClGMJsV (S)  | S | D | I | K | S | Y | I | D | K | D | G | - | D | T | L | E | W | - | - | - | G | E | F | Q | - | - | V | D | G | R |
| 058 | WAAV2 (S)    | S | D | V | K | S | Y | I | E | K | G | G | - | D | F | I | D | H | - | - | - | G | Q | F | Q | - | - | V | D | P | R |
| 059 | TbLCKMV (S)  | S | D | V | K | S | Y | L | D | K | D | G | - | D | T | L | E | W | - | - | - | G | E | F | Q | - | - | I | D | G | R |
| 060 | BleICV (S)   | S | D | V | K | S | Y | I | S | K | D | G | - | D | T | I | D | W | - | - | - | G | E | F | Q | - | - | I | D | G | R |
| 061 | AbMV (S)     | S | D | V | K | S | Y | I | D | K | D | G | - | D | T | A | E | W | - | - | - | G | E | F | Q | - | - | I | D | G | R |
| 062 | PeLCV (S)    | S | D | V | K | S | Y | L | E | K | D | G | - | D | T | L | E | W | - | - | - | G | E | F | Q | - | - | I | D | G | R |
| 063 | ToSRV (RXXS) | S | D | V | K | S | Y | V | D | K | D | G | - | D | T | I | E | W | - | - | - | G | E | F | Q | - | - | I | D | G | R |
| 064 | CpCDV (N)    | K | Q | V | L | D | Y | I | S | K | D | G | - | D | I | K | T | R | - | - | - | G | D | F | R | D | H | K | I | S | P |
| 065 | TRYLCV (D)   | N | A | V | K | N | Y | I | T | K | E | G | - | D | Y | C | E | S | - | - | - | G | Q | Y | Q | - | - | - | - | - | - |
| 066 | SiMBoV1 (S)  | S | D | V | K | S | Y | I | D | K | D | G | - | D | T | L | E | W | - | - | - | G | E | F | Q | - | - | I | D | G | R |
| 067 | MSV (S)      | N | K | V | R | D | Y | I | L | K | E | P | L | A | V | F | E | R | - | - | - | G | T | F | I | P | R | K | S | S | F |
| 068 | ToLCArV (S)  | S | D | V | K | S | Y | I | D | K | D | G | - | D | A | L | E | W | - | - | - | G | E | F | Q | - | - | I | D | G | R |
| 069 | PDSMV (V)    | H | K | V | L | A | Y | I | R | K | G | P | V | C | F | V | E | H | - | - | - | G | A | F | K | D | E | A | K | E | K |
| 070 | PanSV (S)    | D | K | V | R | E | Y | I | L | K | D | P | K | D | K | W | E | K | - | - | - | G | T | Y | I | P | R | K | K | S | F |
| 071 | ToLCGxV (S)  | S | D | V | K | S | Y | L | E | K | D | G | - | D | T | L | D | W | - | - | - | G | E | F | Q | - | - | I | D | G | R |
| 072 | BCSMV (M)    | H | K | V | L | A | Y | I | K | K | N | P | L | C | F | V | E | T | - | - | - | G | V | F | Q | A | S | T | K | Q | K |
| 073 | DSV (S)      | N | K | V | R | T | Y | I | L | K | N | P | V | E | K | F | E | R | - | - | - | G | T | F | V | P | R | K | S | P | F |
| 074 | AYVV (S)     | S | D | V | K | S | Y | I | D | K | D | G | - | D | T | V | D | W | - | - | - | G | E | F | Q | - | - | I | D | G | R |
| 075 | SLCuPV (S)   | S | D | V | K | S | Y | I | N | K | D | G | - | D | T | I | E | W | - | - | - | G | K | F | Q | - | - | V | D | G | R |
| 076 | MCLCuV (D)   | N | A | V | K | N | Y | I | T | K | E | G | - | D | Y | C | E | S | - | - | - | G | Q | Y | K | - | - | - | - | - | - |
| 077 | ToLCHaiV (S) | S | D | V | K | S | Y | I | D | K | D | G | - | D | T | I | D | W | - | - | - | G | E | F | Q | - | - | I | D | G | R |
| 078 | ChaYMV (S)   | S | D | V | K | S | Y | I | E | K | D | G | - | D | S | I | E | W | - | - | - | G | E | F | Q | - | - | V | D | G | R |
| 079 | TYLCSV (S)   | S | D | V | K | S | Y | I | D | K | D | G | - | D | V | L | E | W | - | - | - | G | T | F | Q | - | - | I | D | G | R |
| 080 | MacYMFV (S)  | S | D | V | K | S | Y | I | D | K | D | G | - | D | T | L | E | W | - | - | - | G | E | F | Q | - | - | V | D | G | R |
| 081 | ChLCV (D)    | N | A | V | K | N | Y | I | T | K | E | G | - | D | Y | C | E | S | - | - | - | G | Q | Y | K | - | - | - | - | - | - |
| 082 | JMN (S)      | S | D | V | K | A | Y | L | E | K | D | G | - | D | V | L | D | W | - | - | - | G | Q | F | Q | - | - | I | D | R | R |
| 083 | WDV (D)      | N | Q | V | R | D | Y | I | T | K | E | V | D | S | D | V | N | T | A | E | W | G | T | F | I | A | V | T | T | P | G |



|     |                |   |   |   |   |   |   |   |   |   |   |   |   |   |   |   |   |   |   |   |   |   |   |   |   |   |   |   |   |   |   |
|-----|----------------|---|---|---|---|---|---|---|---|---|---|---|---|---|---|---|---|---|---|---|---|---|---|---|---|---|---|---|---|---|---|
| 084 | AbMBoV (S)     | S | D | V | K | S | Y | V | D | K | D | G | - | D | I | L | V | W | - | - | G | E | F | Q | - | - | I | D | G | R |   |
| 085 | SPLCHnV (S)    | S | D | V | K | A | Y | I | E | K | D | Q | - | D | F | V | D | S | - | - | G | V | F | Q | - | - | V | D | G | R |   |
| 086 | CleLCrV (S)    | S | D | V | K | S | Y | V | D | K | D | G | - | D | T | L | E | W | - | - | G | T | F | Q | - | - | I | D | G | R |   |
| 087 | ToLCHsV (S)    | S | D | V | K | K | Y | M | E | K | D | G | - | D | T | A | E | W | - | - | G | E | F | Q | - | - | V | D | G | R |   |
| 088 | SiYMYuV (S)    | S | D | V | K | S | Y | V | E | K | D | G | - | D | T | I | E | W | - | - | G | E | F | Q | - | - | I | D | G | R |   |
| 089 | SPLCUV (RXXS)  | S | D | V | K | S | Y | V | D | K | D | G | - | D | T | L | E | W | - | - | G | E | F | Q | - | - | V | D | G | R |   |
| 090 | ToLCGdV (S)    | S | D | V | K | S | Y | I | H | K | D | G | - | D | I | I | E | W | - | - | G | Q | F | Q | - | - | V | D | G | R |   |
| 091 | EACMZV (S)     | S | D | V | K | S | Y | I | D | K | D | G | - | D | T | T | E | W | - | - | G | E | F | Q | - | - | I | D | A | R |   |
| 092 | ToMYLCV (D)    | N | A | V | K | N | Y | I | T | K | E | G | - | D | Y | C | E | S | - | - | G | K | Y | K | - | - | - | - | - | - |   |
| 093 | SACMV (S)      | S | D | V | K | S | Y | L | D | K | D | G | - | D | T | I | Q | W | - | - | G | E | F | Q | - | - | I | D | G | R |   |
| 094 | ToLDeV (S)     | T | D | V | N | A | Y | V | D | K | D | G | - | D | T | L | E | W | - | - | G | E | F | Q | - | - | V | D | G | R |   |
| 095 | ToMoV (S)      | S | D | V | K | S | Y | I | D | K | D | G | - | D | T | I | E | W | - | - | G | D | F | Q | - | - | I | D | G | R |   |
| 096 | TPCTV (S)      | S | D | V | N | S | Y | V | D | K | D | G | - | D | T | I | E | W | - | - | G | E | F | Q | - | - | I | D | A | R |   |
| 097 | TYLCV (S)      | T | D | V | K | T | Y | V | E | K | D | G | - | N | F | I | D | F | - | - | G | V | S | Q | - | - | I | D | G | R |   |
| 098 | ViYMV (D)      | N | A | V | K | N | Y | I | T | K | E | G | - | D | Y | C | E | S | - | - | G | Q | Y | K | - | - | - | - | - | - |   |
| 099 | DCSMV (M)      | H | K | V | L | A | Y | C | K | K | S | P | V | S | Y | A | E | E | - | - | G | A | Y | T | E | S | - | D | V | R |   |
| 100 | ACMV (S)       | S | D | V | K | S | Y | L | D | K | D | G | - | D | T | V | E | W | - | - | G | R | F | Q | - | - | I | D | G | R |   |
| 101 | ICMV (S)       | S | D | V | K | S | Y | I | D | K | D | G | - | D | T | L | E | W | - | - | G | T | F | Q | - | - | I | D | G | R |   |
| 102 | SSEV (S)       | D | R | V | K | E | Y | V | L | K | N | P | I | K | Q | W | E | K | - | - | G | T | F | I | P | R | K | K | S | F |   |
| 103 | CabLCV (D)     | N | A | V | K | N | Y | I | T | K | D | G | - | D | Y | C | E | S | - | - | G | Q | Y | K | - | - | - | - | - | - |   |
| 104 | ToYLDV (S)     | S | D | V | K | S | Y | I | D | K | D | G | - | D | T | L | E | W | - | - | G | E | F | Q | - | - | I | D | G | R |   |
| 105 | ToLCLV (S)     | S | D | V | K | S | Y | L | E | K | D | G | - | D | T | L | D | W | - | - | G | E | F | Q | - | - | I | D | G | R |   |
| 106 | USV (S)        | D | K | V | R | A | Y | I | L | K | D | P | I | A | L | W | E | R | - | - | G | T | F | I | P | R | K | K | S | F |   |
| 107 | ODV (N)        | N | D | V | R | E | Y | I | T | K | E | V | D | S | H | E | H | T | A | E | W | G | T | F | I | H | H | T | T | S | G |
| 108 | TbMoLCV (S)    | S | D | V | K | S | Y | I | D | K | D | G | - | D | T | L | E | W | - | - | G | E | F | Q | - | - | V | D | G | R |   |
| 109 | MaYMV (S)      | S | D | V | K | S | Y | I | H | K | D | G | - | D | T | L | E | W | - | - | G | E | F | Q | - | - | I | D | G | R |   |
| 110 | SPLCSPV (RXXS) | S | D | V | K | S | Y | V | D | K | D | G | - | D | T | L | E | W | - | - | G | E | F | Q | - | - | V | D | G | R |   |
| 111 | PSLDV (S)      | S | D | V | K | T | Y | V | E | K | D | G | - | D | F | I | D | H | - | - | G | I | F | Q | - | - | I | D | G | R |   |
| 112 | SiYMoV (S)     | S | D | V | K | S | Y | I | D | K | D | G | - | D | T | L | E | W | - | - | G | E | F | Q | - | - | I | D | G | R |   |
| 113 | CpCV (N)       | E | Q | V | L | D | Y | I | S | K | D | G | - | N | V | I | T | R | - | - | G | D | F | R | K | H | K | V | S | P |   |
| 114 | ToLCPalV (S)   | S | D | V | K | T | Y | I | D | K | D | G | - | D | V | L | E | W | - | - | G | V | F | Q | - | - | I | D | G | R |   |
| 115 | HeuYMV (S)     | S | D | V | K | S | Y | I | D | K | D | G | - | D | T | L | E | W | - | - | G | E | F | Q | - | - | I | D | A | R |   |
| 116 | PaLCrV (S)     | S | D | V | K | S | Y | M | E | K | D | G | - | D | T | L | D | W | - | - | G | E | F | Q | - | - | I | D | G | R |   |
| 117 | BCTV (RXXS)    | S | D | V | K | S | Y | V | D | K | D | G | - | D | T | I | E | W | - | - | G | E | F | Q | - | - | I | D | G | R |   |
| 118 | CpCAV (N)      | E | Q | V | L | D | Y | I | S | K | D | G | - | S | V | I | T | R | - | - | G | D | F | R | K | H | K | V | S | P |   |
| 119 | ToLCUV (S)     | S | D | V | N | S | Y | L | D | K | D | G | - | D | T | I | E | W | - | - | G | E | F | Q | - | - | I | D | G | R |   |
| 120 | ToICV (S)      | S | D | V | K | A | Y | V | E | K | D | G | - | D | F | V | D | H | - | - | G | V | F | Q | - | - | I | D | G | R |   |
| 121 | SiCGMV (S)     | S | D | V | K | S | Y | L | E | K | D | G | - | D | T | V | E | W | - | - | G | E | F | Q | - | - | I | D | G | R |   |
| 122 | SPLCSiV2 (S)   | S | D | V | K | S | Y | V | E | K | D | G | - | D | T | L | T | W | - | - | G | E | F | Q | - | - | I | D | G | R |   |
| 123 | ALCuV (S)      | S | D | V | K | S | Y | L | E | K | D | G | - | D | T | L | E | W | - | - | G | E | F | Q | - | - | I | D | G | R |   |
| 124 | PreLCV (S)     | S | D | V | K | S | Y | I | D | K | D | G | - | D | T | L | D | W | - | - | G | E | F | Q | - | - | I | D | G | R |   |
| 125 | MacYVV (S)     | S | D | V | K | S | Y | I | E | K | D | G | - | D | Y | V | E | W | - | - | G | H | F | Q | - | - | V | D | G | R |   |
| 126 | CabLCJV (S)    | S | D | V | K | S | Y | I | D | K | D | G | - | D | T | I | E | W | - | - | G | V | F | Q | - | - | I | D | G | R |   |
| 127 | MaYVV (S)      | S | D | V | K | T | Y | I | K | K | D | G | - | D | I | L | D | H | - | - | G | I | F | Q | - | - | V | D | G | R |   |
| 128 | VeYVfV (S)     | T | D | V | K | A | Y | M | E | K | D | G | - | D | I | L | D | H | - | - | G | V | F | Q | - | - | V | D | G | R |   |
| 129 | StaLCuV (S)    | S | D | V | K | S | Y | I | D | K | D | G | - | D | T | L | E | W | - | - | G | E | F | Q | - | - | I | D | G | R |   |
| 130 | CoChSpV (N)    | D | A | V | K | N | Y | I | T | K | G | G | - | D | F | C | E | S | - | - | G | Q | Y | K | - | - | - | - | - | - |   |
| 131 | TYLCCNV (S)    | T | D | V | K | S | Y | M | E | K | D | G | - | D | V | L | D | H | - | - | G | I | F | Q | - | - | I | D | G | R |   |
| 132 | PepLCYnV (S)   | S | D | V | K | S | Y | I | K | K | D | G | - | D | I | I | D | W | - | - | G | E | F | Q | - | - | I | D | A | R |   |
| 133 | FbLCV (S)      | S | D | V | K | S | Y | I | D | K | D | G | - | D | T | L | E | W | - | - | G | D | F | Q | - | - | I | D | G | R |   |
| 134 | ToRMV (RXXS)   | S | D | V | K | S | Y | V | D | K | D | G | - | D | T | I | E | W | - | - | G | E | F | Q | - | - | I | D | G | R |   |
| 135 | HYVV (S)       | S | D | V | K | T | Y | M | E | K | D | G | - | D | I | R | D | F | - | - | G | V | F | Q | - | - | V | D | G | R |   |
| 136 | SpiYVSKV (S)   | S | D | V | K | S | Y | I | E | K | D | S | - | D | Y | I | S | N | - | - | E | A | W | Y | N | V | I | D | D | V |   |
| 137 | DesLDV (D)     | N | A | V | R | N | Y | I | T | K | E | G | - | D | Y | C | E | S | - | - | G | Q | Y | K | - | - | - | - | - | - |   |
| 138 | MSRV (S)       | N | K | T | R | E | Y | I | L | K | S | P | I | T | V | Y | S | R | - | - | G | T | F | I | P | R | A | G | - | - |   |
| 139 | JacMYuV (D)    | N | A | V | K | N | Y | I | T | K | E | G | - | D | Y | C | E | S | - | - | G | Q | Y | K | - | - | - | - | - | - |   |
| 140 | MeYVMBaV (S)   | S | D | V | K | S | Y | I | E | K | D | G | - | D | I | L | D | W | - | - | G | Q | F | Q | - | - | I | D | G | R |   |
| 141 | SiMSiV (S)     | S | D | V | K | S | Y | I | E | K | D | G | - | D | T | V | D | W | - | - | G | E | F | Q | - | - | I | D | G | R |   |
| 142 | SiGMFlV (S)    | S | D | V | K | S | Y | I | N | K | D | G | - | D | T | L | E | W | - | - | G | E | F | Q | - | - | I | D | G | R |   |
| 143 | SiMoV (S)      | S | D | V | K | S | Y | I | D | K | D | G | - | D | T | V | E | W | - | - | G | E | F | Q | - | - | V | D | G | R |   |
| 144 | PouGMV (S)     | S | D | V | K | S | Y | M | E | K | D | G | - | D | T | V | E | W | - | - | G | E | F | Q | - | - | I | D | G | R |   |
| 145 | EMSV (D)       | S | K | V | L | G | Y | I | T | K | Q | N | G | E | E | Y | I | F | - | - | G | K | P | T | L | P | K | K | K | K |   |
| 146 | ToLCCNV (S)    | T | D | V | K | S | Y | M | D | K | D | G | - | D | V | L | D | H | - | - | G | V | F | Q | - | - | I | D | G | R |   |
| 147 | SiMBoV2 (S)    | S | D | V | K | S | Y | V | D | K | D | G | - | D | T | L | E | W | - | - | G | I | F | Q | - | - | I | D | G | R |   |
| 148 | BGYMV (S)      | S | D | V | K | E | Y | I | D | K | D | G | - | V | T | I | E | W | - | - | G | Q | F | Q | - | - | V | D | G | R |   |
| 149 | SbMMoV (S)     | S | D | V | K | T | Y | I | D | K | D | G | - | D | T | I | Q | W | - | - | G | S | F | Q | - | - | I | D | G | R |   |
| 150 | LYMV (S)       | S | D | V | K | S | Y | I | E | K | D | G | - | D | Y | I | D | W | - | - | G | Q | F | Q | - | - | I | D | G | R |   |
| 151 | ToLCTV (S)     | T | D | V | K | T | Y | M | D | K | D | G | - | D | V | L | D | H | - | - | G | I | F | Q | - | - | V | D | G | R |   |
| 152 | JMINV (S)      | S | D | V | K | S | Y | I | D | K | D | G | - | D | T | L | E | W | - | - | G | E | F | Q | - | - | V | D | G | R |   |
| 153 | PYMV (S)       | S | D | V | K | S | Y | V | E | K | D | G | - | D | T | I | E | W | - | - | G | L | F | Q | - | - | I | D | G | R |   |



|                   |   |   |   |   |   |   |   |   |   |   |   |   |   |   |   |   |   |   |   |   |   |   |   |   |   |   |   |   |   |   |
|-------------------|---|---|---|---|---|---|---|---|---|---|---|---|---|---|---|---|---|---|---|---|---|---|---|---|---|---|---|---|---|---|
| 154 TYDV (N)      | E | Q | V | L | E | Y | I | S | K | D | G | - | N | V | I | T | K | - | - | - | G | E | F | K | H | R | V | S | P |   |
| 155 MacYMV (S)    | S | D | V | K | S | Y | I | D | K | D | G | - | V | T | V | E | W | - | - | - | G | E | F | Q | - | - | V | D | G | R |
| 156 ToChLPV (S)   | S | D | V | K | S | Y | I | D | K | D | G | - | D | T | L | E | W | - | - | - | G | E | F | Q | - | - | I | D | G | R |
| 157 ToLCMYV (S)   | S | D | V | K | S | Y | I | D | K | D | G | - | D | T | L | D | W | - | - | - | G | E | F | Q | - | - | I | D | G | R |
| 158 MacGMV (S)    | S | D | V | K | S | Y | V | E | K | D | G | - | D | T | I | E | W | - | - | - | G | V | F | Q | - | - | I | D | G | R |
| 159 TYLCYnV (S)   | S | D | V | K | S | Y | L | E | K | D | G | - | D | T | I | E | W | - | - | - | G | E | F | Q | - | - | I | D | A | R |
| 160 CoGMV (S)     | S | D | A | K | S | Y | I | E | K | D | G | - | V | F | C | E | W | - | - | - | G | T | F | Q | - | - | V | D | G | R |
| 161 OYCrV (S)     | S | D | V | K | S | Y | I | D | K | D | G | - | D | T | L | E | W | - | - | - | G | E | F | Q | - | - | V | D | G | R |
| 162 RhGMHaV (S)   | S | D | V | K | S | Y | I | D | K | D | G | - | D | T | L | Q | W | - | - | - | G | E | F | Q | - | - | I | D | G | R |
| 163 ToLCNDV3 (S)  | S | D | V | K | A | Y | I | D | K | D | G | - | D | V | L | E | W | - | - | - | G | V | F | Q | - | - | I | D | G | R |
| 164 SpYVV (S)     | S | D | V | K | S | Y | I | D | K | D | G | - | D | T | L | E | W | - | - | - | G | E | F | Q | - | - | I | D | G | R |
| 165 RhMMV (S)     | S | D | V | K | S | Y | I | D | K | D | G | - | D | T | I | E | W | - | - | - | G | E | F | Q | - | - | I | D | G | R |
| 166 EuLCuV (S)    | S | D | V | K | S | Y | I | N | K | D | G | - | D | T | I | E | W | - | - | - | G | Q | F | Q | - | - | V | D | G | R |
| 167 MCLMV (D)     | N | A | V | K | N | Y | I | T | K | E | G | - | D | Y | C | E | S | - | - | - | G | E | Y | K | - | - | - | - | - | - |
| 168 ToLCSiV (S)   | S | D | V | K | S | Y | I | D | K | D | G | - | D | T | I | E | W | - | - | - | G | Q | F | Q | - | - | I | D | G | R |
| 169 ChiLCV (S)    | S | D | V | K | A | Y | V | E | K | D | G | - | D | F | I | D | F | - | - | - | G | V | F | Q | - | - | I | D | G | R |
| 170 ToLCPatV (S)  | S | D | V | K | S | Y | L | E | K | D | G | - | D | T | L | D | W | - | - | - | G | E | F | Q | - | - | I | D | G | R |
| 171 TbLCTHV (S)   | T | D | V | K | A | Y | M | E | K | D | G | - | D | V | L | D | H | - | - | - | G | V | F | Q | - | - | I | D | G | R |
| 172 SMLCuV (D)    | N | A | V | K | N | Y | I | T | K | E | G | - | D | Y | C | E | S | - | - | - | G | K | Y | K | - | - | - | - | - | - |
| 173 ToLDV (S)     | S | D | V | K | S | Y | I | D | K | D | G | - | D | T | I | E | W | - | - | - | G | E | F | Q | - | - | V | D | G | R |
| 174 ToCmMV (D)    | N | A | V | K | N | Y | I | T | K | E | G | - | D | Y | C | E | S | - | - | - | G | Q | Y | K | - | - | - | - | - | - |
| 175 ToCSV (S)     | S | D | V | K | S | Y | I | D | K | D | G | - | D | T | L | E | W | - | - | - | G | E | F | Q | - | - | V | D | G | R |
| 176 EuYMV (D)     | N | A | V | K | N | Y | I | T | K | E | G | - | D | Y | C | E | S | - | - | - | G | Q | Y | K | - | - | - | - | - | - |
| 177 PuYMV (S)     | S | D | V | K | S | Y | L | D | K | D | G | - | D | T | L | D | W | - | - | - | G | E | F | Q | - | - | I | D | G | R |
| 178 SiYMCNV (S)   | S | D | V | K | S | Y | I | D | K | D | G | - | D | T | L | D | W | - | - | - | G | E | F | Q | - | - | V | D | G | R |
| 179 PepYLCCNV (S) | S | D | V | K | S | Y | I | K | K | D | G | - | D | Y | I | N | W | - | - | - | G | S | F | Q | - | - | I | D | G | R |
| 180 SPLCSiV1 (S)  | S | D | V | K | A | Y | I | E | K | D | Q | - | D | F | V | D | S | - | - | - | G | V | F | Q | - | - | V | D | G | R |
| 181 SPLCGV (S)    | S | D | V | K | S | Y | I | E | K | D | G | - | D | Y | I | D | W | - | - | - | G | T | F | Q | - | - | V | D | G | R |
| 182 ToLCLKV (S)   | S | D | V | K | S | Y | M | E | K | D | G | - | D | V | L | D | F | - | - | - | G | I | F | Q | - | - | V | D | G | R |
| 183 MerMV (S)     | S | D | V | K | S | Y | I | D | K | D | G | - | D | T | I | Q | R | - | - | - | G | Q | F | Q | - | - | I | D | G | R |
| 184 EACMKV (S)    | S | D | V | K | S | Y | M | D | K | D | G | - | D | T | I | Q | W | - | - | - | G | E | F | Q | - | - | I | D | G | R |
| 185 MacMPRV (S)   | S | D | V | K | A | Y | I | D | K | D | G | - | V | T | I | E | W | - | - | - | G | Q | F | Q | - | - | I | D | G | R |
| 186 MaYVYnV (S)   | S | D | V | K | T | Y | V | E | K | D | G | - | D | I | L | D | H | - | - | - | G | I | F | Q | - | - | V | D | G | R |
| 187 ToYSV (S)     | S | D | V | K | S | Y | I | D | K | D | G | - | D | T | L | E | W | - | - | - | G | K | F | Q | - | - | V | D | G | R |
| 188 MacYSV (S)    | S | D | A | K | S | Y | I | E | K | D | G | - | D | Y | V | E | W | - | - | - | G | D | F | Q | - | - | I | D | G | R |
| 189 BYVMV (S)     | S | D | V | K | S | Y | I | D | K | D | G | - | D | T | L | E | W | - | - | - | G | E | F | Q | - | - | I | D | G | R |
| 190 ToLCDiV (S)   | S | D | V | K | S | Y | I | D | K | D | G | - | D | T | L | E | W | - | - | - | G | E | F | Q | - | - | V | D | G | R |
| 191 ToLCLwV (S)   | S | D | V | K | S | Y | I | E | K | D | G | - | D | Y | I | D | W | - | - | - | G | Q | F | Q | - | - | I | D | G | R |
| 192 BChV (S)      | S | D | V | K | S | Y | I | D | K | D | G | - | D | S | I | E | W | - | - | - | G | D | F | Q | - | - | I | D | G | R |
| 193 CoYV (S)      | S | D | V | K | S | Y | I | D | K | D | G | - | D | T | L | E | W | - | - | - | G | E | F | Q | - | - | I | D | G | R |
| 194 PHYVV (S)     | S | D | V | K | T | Y | I | D | K | D | G | - | D | T | V | E | W | - | - | - | G | E | F | Q | - | - | I | D | G | R |
| 195 ToLCAhV (S)   | S | D | V | K | A | Y | I | E | K | G | G | - | E | F | L | D | Y | - | - | - | G | V | F | Q | - | - | V | D | A | R |
| 196 ToLCMGV (S)   | S | D | V | K | S | Y | I | D | K | D | G | - | D | T | I | E | W | - | - | - | G | E | F | Q | - | - | I | D | G | R |
| 197 TYLCTHV (S)   | T | D | V | K | A | Y | M | E | K | D | G | - | D | V | L | D | H | - | - | - | G | I | F | Q | - | - | I | D | G | R |
| 198 ChiLCINV (S)  | S | D | V | K | S | Y | I | E | K | D | G | - | D | Y | I | D | W | - | - | - | G | Q | F | Q | - | - | V | D | G | R |
| 199 SiGMV (S)     | S | D | V | K | S | Y | I | D | K | D | G | - | D | T | V | E | W | - | - | - | G | E | F | Q | - | - | I | D | G | R |
| 200 SgYVV (S)     | S | D | V | K | T | Y | M | E | K | D | G | - | D | I | L | D | S | - | - | - | G | V | F | Q | - | - | I | D | G | R |
| 201 SacSV (S)     | D | R | V | R | E | Y | I | L | K | D | P | L | C | Q | W | E | K | - | - | - | G | T | F | V | P | R | K | K | P | F |
| 202 TbLCuCV (S)   | S | D | V | K | S | Y | I | D | K | D | G | - | D | T | L | E | W | - | - | - | G | K | F | Q | - | - | I | D | G | R |
| 203 AEV (S)       | T | D | V | K | S | Y | I | D | K | D | G | - | D | T | L | E | W | - | - | - | G | E | F | Q | - | - | I | D | G | R |
| 204 ToLCVV (S)    | T | D | V | K | A | Y | M | D | K | D | G | - | D | V | L | D | H | - | - | - | G | V | F | Q | - | - | I | D | G | R |
| 205 ClGMV (S)     | S | D | V | K | S | Y | M | D | K | D | G | - | D | T | L | E | W | - | - | - | G | E | F | Q | - | - | I | D | G | R |
| 206 LaYVV (S)     | S | D | V | K | S | Y | M | E | K | D | G | - | D | T | I | D | W | - | - | - | G | E | F | Q | - | - | I | D | G | R |
| 207 ToLCNDV (S)   | S | D | V | K | A | Y | I | D | K | D | G | - | D | I | L | E | W | - | - | - | G | V | F | Q | - | - | I | D | G | R |
| 208 SiYVV (S)     | S | D | V | K | S | Y | I | D | K | D | G | - | D | T | I | E | W | - | - | - | G | E | F | Q | - | - | V | D | G | R |
| 209 ToLCNDV2 (S)  | S | D | V | K | S | Y | I | D | K | D | G | - | D | T | L | E | W | - | - | - | G | E | F | Q | - | - | I | D | G | R |
| 210 SbCBV (S)     | S | D | V | K | S | Y | I | D | K | D | G | - | D | T | V | S | W | - | - | - | G | E | F | Q | - | - | I | D | G | R |
| 211 ToDfLV (S)    | S | D | V | K | S | Y | I | D | K | D | G | - | D | T | L | E | W | - | - | - | G | E | F | Q | - | - | I | D | G | R |
| 212 TGMV (RXXS)   | S | D | V | K | T | Y | I | D | K | D | G | - | D | T | L | V | W | - | - | - | G | E | F | Q | - | - | V | D | G | R |
| 213 ToMHaV (S)    | S | D | V | K | A | Y | I | D | K | D | G | - | D | A | T | E | W | - | - | - | G | E | F | Q | - | - | I | D | G | R |
| 214 SgYVGxV (S)   | S | D | V | K | T | Y | M | E | K | D | G | - | D | I | L | D | N | - | - | - | G | V | F | Q | - | - | V | D | G | R |
| 215 ToLCKeV (S)   | S | D | V | K | S | Y | L | E | K | D | G | - | D | T | L | D | W | - | - | - | G | E | F | Q | - | - | I | E | W | R |
| 216 SiYMV (S)     | S | D | V | K | K | Y | V | E | K | D | G | - | D | F | I | D | F | - | - | - | G | V | F | Q | - | - | I | D | P | R |
| 217 SPMV (S)      | S | D | V | K | S | Y | V | D | K | D | G | - | D | T | L | T | W | - | - | - | G | E | F | Q | - | - | I | D | G | R |
| 218 ToLCCeV (S)   | S | D | V | K | S | Y | I | D | K | D | G | - | D | T | V | E | W | - | - | - | G | E | F | Q | - | - | V | D | G | R |
| 219 TGVV (S)      | S | D | V | K | T | Y | M | E | K | D | G | - | D | F | I | D | F | - | - | - | G | N | F | Q | - | - | I | D | G | R |
| 220 SSMV1 (S)     | T | K | V | K | E | Y | I | L | K | E | P | V | S | Q | S | A | R | - | - | - | G | K | F | V | A | P | G | G | R | P |
| 221 MerMPRV (S)   | S | D | V | K | S | Y | I | D | K | D | G | - | D | T | I | E | W | - | - | - | G | Q | F | Q | - | - | I | D | G | R |
| 222 MiYLCV (S)    | S | D | V | K | S | Y | I | D | K | D | G | - | D | T | I | E | W | - | - | - | G | D | F | Q | - | - | I | D | G | R |



|     |                |   |   |   |   |   |   |   |   |   |   |   |   |   |   |   |   |   |   |   |   |   |   |   |   |   |   |   |   |   |   |
|-----|----------------|---|---|---|---|---|---|---|---|---|---|---|---|---|---|---|---|---|---|---|---|---|---|---|---|---|---|---|---|---|---|
| 223 | RhRGMV (S)     | S | D | V | K | S | Y | I | D | K | D | G | - | D | T | L | E | W | - | - | - | G | E | F | Q | - | - | I | D | G | R |
| 224 | HgYMV (S)      | S | D | V | K | Q | Y | M | E | K | D | G | - | D | V | L | D | H | - | - | - | G | T | F | Q | - | - | I | D | G | R |
| 225 | ToLCYTV (S)    | S | D | V | K | S | Y | I | D | K | D | G | - | D | T | L | E | W | - | - | - | G | E | F | Q | - | - | I | D | G | R |
| 226 | PaLCuCNV (S)   | T | D | V | K | A | Y | M | E | K | D | G | - | D | V | L | D | H | - | - | - | G | V | F | Q | - | - | I | D | G | R |
| 227 | ToLCJV (S)     | T | D | V | K | A | Y | V | E | K | D | G | - | D | F | I | D | F | - | - | - | G | V | F | Q | - | - | I | D | G | R |
| 228 | AbGMV (D)      | N | A | V | K | N | Y | I | T | K | E | G | - | D | Y | C | E | S | - | - | - | G | Q | Y | K | - | - | - | - | - | - |
| 229 | RaLCuV (S)     | S | D | V | K | S | Y | M | E | K | D | G | - | D | T | L | D | W | - | - | - | G | E | F | Q | - | - | I | D | G | R |
| 230 | EuMV (D)       | N | A | V | K | N | Y | I | T | K | D | G | - | D | Y | C | E | S | - | - | - | G | Q | Y | K | - | - | - | - | - | - |
| 231 | PSMV (M)       | K | K | A | L | S | Y | C | K | K | S | P | I | S | E | A | E | Y | - | - | - | G | V | F | Q | E | I | K | R | P | R |
| 232 | WGMV (S)       | S | D | V | K | S | Y | I | D | K | D | G | - | D | T | L | E | W | - | - | - | G | E | F | Q | - | - | I | D | G | R |
| 233 | DDSMV (N)      | E | K | T | L | E | Y | C | Q | K | N | P | A | D | F | Y | E | D | - | - | - | G | V | F | V | K | P | - | K | A | S |
| 234 | AbMBV (D)      | V | A | V | R | N | Y | I | T | K | D | G | - | D | Y | C | E | S | - | - | - | G | Q | Y | K | - | - | - | - | - | - |
| 235 | VeYVV (S)      | S | D | V | K | S | Y | M | E | E | D | G | - | D | I | L | D | F | - | - | - | G | V | F | Q | - | - | I | D | G | R |
| 236 | ToYMLCV (S)    | S | D | V | K | S | Y | I | D | K | D | G | - | D | T | I | Q | W | - | - | - | G | E | F | Q | - | - | I | D | G | R |
| 237 | WAAV1 (S)      | S | D | V | K | S | Y | I | E | K | D | G | - | D | T | L | E | W | - | - | - | G | T | F | Q | - | - | I | D | G | R |
| 238 | MiSV (D)       | E | K | V | F | G | Y | I | S | K | T | N | G | D | S | D | E | M | - | - | - | G | E | L | Q | L | R | N | K | K | - |
| 239 | SiGMCRV (S)    | S | D | V | K | S | Y | I | D | K | D | G | - | D | T | V | E | W | - | - | - | W | E | F | Q | - | - | I | D | G | R |
| 240 | ToCMoV (S)     | S | D | V | K | S | Y | V | E | K | D | G | - | D | F | V | D | H | - | - | - | G | V | F | Q | - | - | I | D | G | R |
| 241 | CLCuBaV (S)    | S | D | V | K | D | Y | I | D | K | D | G | - | D | T | L | E | W | - | - | - | G | E | F | Q | - | - | I | D | G | R |
| 242 | ToLCPuV (RXXS) | S | D | V | K | A | Y | V | E | K | D | G | - | D | F | I | D | F | - | - | - | G | V | F | Q | - | - | I | D | G | R |
| 243 | MaYMJV (S)     | S | D | V | K | S | Y | V | N | K | G | G | - | D | T | L | E | W | - | - | - | G | E | F | Q | - | - | I | D | G | R |
| 244 | MYMV (S)       | S | D | V | K | S | Y | M | D | K | D | G | - | D | V | L | D | H | - | - | - | G | S | F | Q | - | - | V | D | G | R |
| 245 | ToLCRaV (S)    | S | D | V | K | A | Y | I | D | K | D | G | - | D | V | L | E | W | - | - | - | G | V | F | Q | - | - | I | D | G | R |
| 246 | CpYV (N)       | E | Q | V | L | D | Y | I | S | K | D | E | - | N | V | I | T | K | - | - | - | G | E | F | R | K | H | K | V | S | P |
| 247 | SoMBoV (S)     | S | D | V | K | T | Y | M | E | K | D | G | - | D | F | V | D | F | - | - | - | G | T | F | Q | - | - | I | D | G | R |
| 248 | ToMoWV (S)     | S | D | V | K | S | Y | I | D | K | D | G | - | D | T | L | E | W | - | - | - | G | E | F | Q | - | - | I | D | G | R |
| 249 | EACMV (S)      | S | D | V | K | A | Y | I | E | K | G | G | - | E | F | L | D | D | - | - | - | G | I | F | Q | - | - | V | D | A | R |
| 250 | TbLRV (S)      | S | D | V | K | S | Y | I | D | K | D | G | - | D | T | L | E | W | - | - | - | G | E | F | Q | - | - | I | D | G | R |
| 251 | SiCMV (S)      | S | D | V | K | S | Y | V | E | K | D | G | - | D | T | V | E | W | - | - | - | G | T | F | Q | - | - | I | D | G | R |
| 252 | HemYMV (RXXS)  | S | D | V | K | A | Y | I | G | K | D | G | - | D | T | L | D | W | - | - | - | G | E | F | Q | - | - | V | D | D | E |
| 253 | SPLCSCV (RXXS) | S | D | V | K | S | Y | V | D | K | D | G | - | D | T | I | E | W | - | - | - | G | E | F | Q | - | - | V | D | G | R |
| 254 | TbYCV (S)      | S | D | V | K | S | Y | I | D | K | D | G | - | D | T | L | Q | W | - | - | - | G | D | F | Q | - | - | I | D | G | R |
| 255 | PepGMV (D)     | N | A | V | K | N | Y | I | T | K | E | G | - | D | Y | C | E | T | - | - | - | G | H | Y | K | - | - | - | - | - | - |
| 256 | CLCuKoV (S)    | S | D | V | K | S | Y | I | E | K | D | G | - | D | I | L | D | W | - | - | - | G | Q | F | Q | - | - | I | D | G | R |
| 257 | SauLCuV (S)    | S | D | V | K | S | Y | L | D | K | D | G | - | D | T | L | D | W | - | - | - | G | E | F | Q | - | - | I | D | A | R |
| 258 | ToLCGV (S)     | S | D | V | K | S | Y | I | D | K | D | G | - | D | T | L | E | W | - | - | - | G | E | F | Q | - | - | I | D | G | R |
| 259 | ToMMV (S)      | S | D | V | K | S | Y | V | D | K | D | G | - | D | T | V | E | W | - | - | - | G | V | F | Q | - | - | V | D | G | R |
| 260 | MaLCuV (S)     | S | D | V | K | S | Y | I | N | K | D | G | - | D | T | I | E | W | - | - | - | G | Q | F | Q | - | - | V | D | G | R |
| 261 | JYMINV (S)     | S | D | V | K | S | Y | M | E | K | D | G | - | D | T | I | D | W | - | - | - | G | E | F | Q | - | - | I | D | G | R |
| 262 | SLCuV (E)      | N | A | G | K | N | Y | I | T | K | E | G | - | D | Y | W | Q | S | - | - | - | G | Q | Y | K | - | - | - | - | - | - |
| 263 | OELCuV (S)     | S | D | V | K | T | Y | M | E | K | D | G | - | D | I | L | D | H | - | - | - | G | V | F | Q | - | - | V | D | G | R |
| 264 | MaLCPHV (S)    | S | D | V | K | S | Y | I | N | K | D | G | - | D | T | L | E | W | - | - | - | G | E | F | Q | - | - | I | D | G | R |
| 265 | HrCTV (D)      | N | A | V | K | N | Y | I | T | K | E | G | - | D | Y | C | E | S | - | - | - | G | Q | Y | K | - | - | - | - | - | - |
| 266 | ECSV (S)       | S | K | S | L | K | Y | I | Q | K | E | A | G | Y | F | Y | E | H | - | - | - | G | T | V | P | - | - | C | D | K | R |
| 267 | HoLCV (S)      | S | D | V | K | S | Y | I | A | K | D | G | - | D | I | L | D | W | - | - | - | G | E | F | Q | - | - | I | D | G | R |
| 268 | BYMMxV (S)     | S | D | V | K | S | Y | V | E | K | D | G | - | D | T | L | E | W | - | - | - | G | E | F | Q | - | - | I | D | G | R |
| 269 | JMV (S)        | S | D | V | K | S | Y | I | D | K | D | G | - | D | T | L | E | W | - | - | - | G | E | F | Q | - | - | I | D | G | R |
| 270 | EpYVV (S)      | S | D | V | K | S | Y | M | E | K | D | G | - | D | I | L | D | F | - | - | - | G | V | F | Q | - | - | V | D | G | R |
| 271 | EACMMV (S)     | S | D | V | K | A | Y | I | E | K | G | G | - | E | F | L | D | D | - | - | - | G | V | F | Q | - | - | V | D | A | R |
| 272 | CToLCV (V)     | L | R | C | Q | V | Y | V | E | K | D | G | - | D | Y | I | D | W | - | - | - | G | Q | F | Q | - | - | I | D | G | R |
| 273 | SiGMLaV (D)    | N | A | V | K | N | Y | I | T | K | E | G | - | D | Y | C | E | S | - | - | - | G | Q | Y | K | - | - | - | - | - | - |
| 274 | RhYMIV (S)     | S | D | V | K | K | Y | M | E | K | D | G | - | D | V | V | D | H | - | - | - | G | E | F | Q | - | - | I | D | G | R |
| 275 | TbLCYnV (S)    | S | D | V | K | S | Y | I | D | K | D | G | - | D | T | L | E | W | - | - | - | G | E | F | Q | - | - | I | D | G | R |
| 276 | TYLCMLV (S)    | S | D | V | K | S | Y | I | D | K | D | G | - | D | T | I | D | W | - | - | - | G | E | F | Q | - | - | I | D | G | R |
| 277 | SeYMV (S)      | S | D | V | K | S | Y | L | D | K | D | G | - | D | T | I | E | W | - | - | - | G | E | F | Q | - | - | I | D | G | R |
| 278 | RoLCuV (S)     | S | D | V | K | S | Y | L | E | K | T | - | E | T | P | S | I | - | - | - | G | E | S | F | - | - | R | S | M | E |   |
| 279 | SPLCCV (S)     | S | D | V | K | S | Y | I | E | K | D | G | - | D | Y | L | D | W | - | - | - | G | E | S | Q | - | - | I | D | G | R |
| 280 | ToLCPV (S)     | S | D | V | K | S | Y | I | D | K | D | G | - | D | T | L | E | W | - | - | - | G | E | F | Q | - | - | V | D | G | R |
| 281 | SCTAV (A)      | K | R | A | W | E | Y | I | T | K | E | D | Q | Q | P | R | C | F | - | - | - | G | E | L | R | - | - | L | A | G | R |
| 282 | SPLCCNV (S)    | S | D | V | K | S | Y | V | E | K | D | G | - | D | T | L | N | W | - | - | - | G | E | F | Q | - | - | I | D | G | R |
| 283 | BCaMV (D)      | N | A | V | K | N | Y | I | T | K | E | G | - | D | Y | C | E | S | - | - | - | G | E | Y | K | - | - | - | - | - | - |
| 284 | DiYMoV (S)     | S | D | V | K | S | Y | V | S | K | D | G | - | D | T | L | E | W | - | - | - | G | Q | Y | Q | - | - | V | D | G | R |
| 285 | CLCuGeV (S)    | S | D | V | K | S | Y | I | D | K | D | G | - | D | T | L | E | W | - | - | - | G | E | F | Q | - | - | I | D | G | R |
| 286 | BoYSV (S)      | S | D | V | K | S | Y | I | D | K | D | G | - | D | T | L | E | W | - | - | - | G | E | F | Q | - | - | V | D | G | R |
| 287 | MerLCV (S)     | S | D | V | K | S | Y | I | E | K | D | G | - | D | Y | I | D | W | - | - | - | G | T | F | Q | - | - | V | D | G | R |
| 288 | SiLCuV (S)     | S | D | V | K | S | Y | I | D | K | D | G | - | D | T | I | E | W | - | - | - | G | E | F | Q | - | - | I | D | G | R |
| 289 | AlYVV (S)      | S | D | V | E | A | Y | I | E | K | D | G | - | D | I | L | D | W | - | - | - | G | T | F | Q | - | - | I | D | G | R |
| 290 | MYMIV (S)      | S | D | V | K | T | Y | M | E | K | D | G | - | D | V | L | D | H | - | - | - | G | T | F | Q | - | - | I | D | G | R |
| 291 | ToBYMoV (D)    | N | A | V | K | N | Y | I | T | R | E | G | - | D | Y | C | E | S | - | - | - | G | Q | Y | R | - | - | - | - | - | - |



|     |                |   |   |   |   |   |   |   |   |   |   |   |   |   |   |   |   |   |   |   |   |   |   |   |   |   |   |   |   |   |   |
|-----|----------------|---|---|---|---|---|---|---|---|---|---|---|---|---|---|---|---|---|---|---|---|---|---|---|---|---|---|---|---|---|---|
| 292 | CpRLV (N)      | E | Q | V | L | D | Y | I | S | K | D | G | - | N | I | I | T | K | - | - | - | G | E | F | K | K | H | R | V | S | P |
| 293 | ToLCSCV (S)    | S | D | V | K | S | Y | I | E | K | D | G | - | D | Y | I | D | W | - | - | - | G | T | F | Q | - | - | V | D | G | R |
| 294 | BDMV (S)       | S | D | V | K | S | Y | I | D | K | D | G | - | D | T | V | E | W | - | - | - | G | V | F | Q | - | - | I | D | G | R |
| 295 | RhYMV (S)      | S | D | V | K | Q | Y | V | E | K | D | G | - | D | Y | I | D | H | - | - | - | G | D | F | Q | - | - | V | D | G | R |
| 296 | SiYLCV (D)     | N | A | V | K | N | Y | I | T | K | E | G | - | D | Y | C | E | S | - | - | - | G | Q | Y | K | - | - | - | - | - |   |
| 297 | ToGMoV (S)     | S | D | V | K | S | Y | I | D | K | D | G | - | D | T | L | E | W | - | - | - | G | E | F | Q | - | - | I | D | G | R |
| 298 | PepYLCIV (S)   | S | D | V | K | A | Y | M | D | K | D | G | - | D | S | I | E | W | - | - | - | G | E | F | Q | - | - | I | D | G | R |
| 299 | BChMV (S)      | S | D | V | K | S | Y | I | D | K | D | G | - | D | T | V | E | W | - | - | - | G | Q | F | Q | - | - | I | D | G | R |
| 300 | SiMoAV (S)     | S | D | V | K | S | Y | V | E | K | D | G | - | D | T | M | E | W | - | - | - | G | E | F | Q | - | - | V | D | G | R |
| 301 | ToYVSV (S)     | S | D | V | K | T | Y | M | E | K | D | G | - | D | F | I | D | F | - | - | - | G | T | F | Q | - | - | I | D | G | R |
| 302 | TbCSV (S)      | T | D | V | K | A | Y | M | E | K | D | G | - | D | V | L | D | H | - | - | - | G | I | F | Q | - | - | I | D | A | R |
| 303 | CeYSV (S)      | S | D | V | K | S | Y | I | D | K | D | G | - | D | T | L | E | W | - | - | - | G | E | F | Q | - | - | I | D | G | R |
| 304 | CoYVV (S)      | S | D | A | K | S | Y | I | E | K | D | G | - | V | F | C | E | W | - | - | - | G | E | F | K | - | - | I | D | G | R |
| 305 | ToSLCV (D)     | N | A | V | Q | N | Y | I | T | K | E | G | - | D | Y | C | E | S | - | - | - | G | Q | Y | K | - | - | - | - | - |   |
| 306 | CLCuAlV (S)    | S | D | V | K | S | Y | I | E | K | D | G | - | D | Y | I | D | W | - | - | - | G | T | F | Q | - | - | I | D | G | R |
| 307 | SSV (S)        | N | K | V | R | A | Y | A | M | K | N | P | V | T | Y | W | E | R | - | - | - | G | T | F | I | P | R | K | T | S | F |
| 308 | SSRV (S)       | N | K | V | R | E | Y | I | L | K | N | P | I | A | K | W | E | K | - | - | - | G | T | F | I | P | R | K | Q | C | F |
| 309 | SbBMV (S)      | S | D | V | K | S | Y | I | D | K | D | G | - | D | T | L | E | W | - | - | - | G | E | F | Q | - | - | I | D | G | R |
| 310 | SiYBV (S)      | S | D | V | K | S | Y | V | E | K | D | G | - | D | T | I | E | W | - | - | - | G | E | F | Q | - | - | I | D | G | R |
| 311 | PepYVMLV (S)   | S | D | V | K | S | Y | I | D | K | D | G | - | D | T | I | E | W | - | - | - | G | V | F | Q | - | - | V | D | G | R |
| 312 | CaYMV (S)      | S | D | V | K | S | Y | I | E | K | D | G | - | D | Y | I | D | W | - | - | - | G | E | F | Q | - | - | I | D | G | R |
| 313 | ESV (S)        | N | K | V | R | D | Y | V | L | K | N | P | L | K | V | W | E | R | - | - | - | G | T | F | I | P | R | K | K | T | F |
| 314 | EuLGxCV (S)    | T | D | V | K | A | Y | M | E | K | D | G | - | D | V | L | D | H | - | - | - | G | V | F | Q | - | - | I | D | G | R |
| 315 | SLCCNV (S)     | S | D | V | K | Q | Y | I | D | K | D | G | - | D | V | L | E | W | - | - | - | G | V | F | Q | - | - | I | D | G | R |
| 316 | ToLCMLV (S)    | S | D | V | K | S | Y | I | D | K | D | G | - | D | T | L | E | W | - | - | - | G | E | F | Q | - | - | I | D | G | R |
| 317 | BGMV (S)       | S | D | V | K | S | Y | I | E | K | D | G | - | D | Y | I | E | W | - | - | - | G | H | F | Q | - | - | V | D | G | R |
| 318 | SpSCTV (D)     | N | A | V | H | N | Y | I | T | K | E | G | - | D | Y | C | E | S | - | - | - | G | Q | Y | K | - | - | - | - | - |   |
| 319 | BLYSV (S)      | S | D | A | K | S | Y | V | E | K | D | G | - | D | Y | I | E | W | - | - | - | G | N | F | Q | - | - | I | D | G | R |
| 320 | ChiLCKV (S)    | S | D | V | K | S | Y | I | E | K | D | S | - | D | Y | I | D | W | - | - | - | G | R | F | Q | - | - | I | D | G | R |
| 321 | SLCMV (S)      | S | D | V | K | S | Y | I | D | K | D | G | - | D | T | I | D | W | - | - | - | G | E | F | Q | - | - | I | D | G | R |
| 322 | MeYVMV (S)     | S | D | V | K | S | Y | I | D | K | D | G | - | D | I | L | E | W | - | - | - | G | K | F | Q | - | - | I | D | G | R |
| 323 | SiMMV (S)      | S | D | V | K | S | Y | I | E | K | D | G | - | D | T | L | E | W | - | - | - | G | E | F | Q | - | - | I | D | G | R |
| 324 | RhGMV (S)      | S | D | V | K | S | Y | I | D | K | D | G | - | D | T | I | E | W | - | - | - | G | E | F | Q | - | - | I | D | G | R |
| 325 | SiGMBRV (S)    | S | D | V | K | S | Y | I | K | K | D | G | - | D | Y | I | D | W | - | - | - | G | T | F | Q | - | - | I | D | G | R |
| 326 | SiGMoV (S)     | S | D | V | K | S | Y | V | E | K | D | G | - | D | T | I | E | W | - | - | - | G | V | F | Q | - | - | I | D | G | R |
| 327 | CarYSYV (D)    | N | A | V | R | N | Y | I | T | K | E | G | - | D | Y | C | E | S | - | - | - | G | Q | Y | K | - | - | - | - | - |   |
| 328 | BYVBhV (T)     | S | D | V | K | S | Y | I | D | K | D | G | - | D | I | L | E | W | - | - | - | G | Q | F | Q | - | - | I | D | G | R |
| 329 | TYLCIDV (S)    | S | D | V | K | A | Y | I | E | K | D | G | - | D | T | L | E | W | - | - | - | G | T | F | Q | - | - | I | D | G | R |
| 330 | ToLCBaV (KXXS) | S | D | V | K | A | Y | V | E | K | D | G | - | D | F | I | D | F | - | - | - | G | V | F | Q | - | - | I | D | G | R |
| 331 | TYLCKaV (S)    | S | D | V | K | S | Y | L | E | K | D | G | - | D | T | I | E | W | - | - | - | G | E | F | Q | - | - | V | D | G | R |
| 332 | ChiLCVV (S)    | S | D | V | K | S | Y | I | E | K | D | G | - | D | Y | I | D | W | - | - | - | G | S | F | Q | - | - | V | D | G | R |
| 333 | DoYMV (S)      | S | D | V | K | S | Y | I | T | K | D | G | - | D | Y | V | D | W | - | - | - | G | T | F | Q | - | - | I | D | G | R |
| 334 | CdTV (S)       | S | D | V | K | S | Y | I | D | K | D | G | - | D | T | V | E | W | - | - | - | G | E | F | Q | - | - | I | D | G | R |
| 335 | ToLCMiV (S)    | S | D | V | K | S | Y | I | D | K | D | G | - | D | T | L | E | W | - | - | - | G | E | F | Q | - | - | I | D | A | R |
| 336 | ToLCJaV (S)    | S | D | V | K | S | Y | I | D | K | D | G | - | D | T | L | E | W | - | - | - | G | E | F | Q | - | - | V | D | G | R |
| 337 | OMoV (S)       | S | D | V | K | S | Y | I | D | K | D | G | - | D | T | V | E | W | - | - | - | G | D | F | Q | - | - | V | D | G | R |

1
2
3
4
5
6
7
8
9  
 Variable      Average      Conserved

**X** - Insufficient data - the calculation for this site was performed on less than 10% of the sequences.
